# Supplementary material
Source: MDPI journal article supplement (https://www.mdpi.com/2073-4344/13/8/1157)
Supplement: s1 [file s1]

## SUPPORTING INFORMATION

**Rhodium-Catalyzed Alkylation of Aromatic Ketones with Allylic Alcohols and  $\alpha,\beta$ -Unsaturated Ketones**Wan-Di Li <sup>†</sup>, Jia-Shuo Zhang <sup>†</sup>, Lin-Yan Zhang, Zhong-Wen Liu, Juan Fan, and Xian-Ying Shi <sup>\*</sup>

Key Laboratory of Syngas Conversion of Shaanxi Province, Key Laboratory for Macromolecular Science of Shaanxi Province, School of Chemistry and Chemical Engineering, Shaanxi Normal University, Xi'an 710062, China; jjw121@snnu.edu.cn (W.-D.L.); zjs1v1@snnu.edu.cn (J.-S.Z.); azhanglinyuan@hotmail.com (L.-Y.Z.); zwliu@snnu.edu.cn (Z.-W.L.); fanjuan@snnu.edu.cn (J.F.)

<sup>\*</sup> Correspondence: shixy@snnu.edu.cn

<sup>†</sup> These authors contributed equally to this work.

**Table of Contents**

|                                                                   |    |
|-------------------------------------------------------------------|----|
| 1. Procedure for the synthesis of <b>3l</b> on 2 mmol scale ..... | S2 |
| 2. Procedure for the synthesis of <b>4a</b> on 1 mmol scale ..... | S2 |
| 3. Mechanistic studies.....                                       | S2 |
| 4. Copies of NMR spectra .....                                    | S4 |

### 1. Procedure for the synthesis of 3I on 2 mmol scale

An oven-dried 50 mL Schlenk tube was charged with 2-(trimethylacetyl)thiophene (315  $\mu$ L, 2.0 mmol), 1-penten-3-ol (411  $\mu$ L, 4.0 mmol),  $[\text{Cp}^*\text{RhCl}_2]_2$  ( $\text{Rh}^*$ , 49 mg, 4 mol%, 0.08 mmol),  $\text{Cu}(\text{OAc})_2 \cdot \text{H}_2\text{O}$  (599.0 mg, 1.5 equiv, 3.0 mmol), KOAc (294.4 mg, 1.5 equiv, 3.0 mmol), and TFE (6 mL). The mixture was stirred at 120  $^\circ\text{C}$  for 24 h under Ar conditions. After cooling to room temperature, the mixture was concentrated to give a crude product, purified by silica gel column chromatography using hexanes/EtOAc (10/1) to yield compound **3I** (0.424 g, 84%).

### 2. Procedure for the synthesis of 4a on 1 mmol scale

An oven-dried 50 mL Schlenk tube was charged with 2,2-dimethylpropiophenone (167  $\mu$ L, 1.0 mmol), 1-penten-3-one (148  $\mu$ L, 1.5 mmol),  $[\text{RhCp}^*\text{Cl}_2]_2$  (18.5 mg, 3 mol%, 0.03 mmol), NaOAc (20.5 mg, 0.25 equiv, 0.25 mmol), and 1,1,1,3,3,3-hexafluoro-2-propanol (10 mL). The mixture was stirred at 120  $^\circ\text{C}$  for 16 h under Ar conditions. After cooling to room temperature, the mixture was concentrated to give a crude product, purified by silica gel column chromatography using hexanes/EtOAc (10/1) to yield compound **4a** (0.209 g, 85%).

### 3. Mechanistic studies

#### 3.1. Ortho deuteration experiment

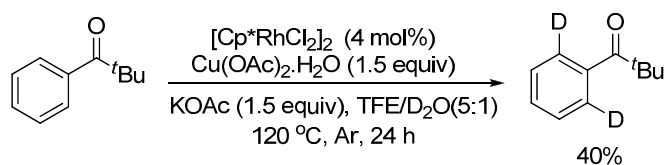

$[\text{Cp}^*\text{RhCl}_2]_2$  ( $\text{Rh}^*$ , 2.5 mg, 4 mol%, 0.004 mmol),  $\text{Cu}(\text{OAc})_2 \cdot \text{H}_2\text{O}$  (29.9 mg, 0.15 mmol), KOAc (14.7 mg, 0.15 mmol), 2,2-dimethylpropiophenone (0.1 mmol),  $\text{D}_2\text{O}$  (0.05 mL), and TFE (0.25 mL) were successively added to a reaction vessel equipped with a stir bar. The vessel was sealed under Ar and heated at 120  $^\circ\text{C}$  (oil bath temperature) for 24 h. The resulting mixture was cooled to room temperature, before being filtered through a short column of silica gel. The solvent was removed under reduced pressure and the amount of *ortho*-deuterated benzaldehyde was determined by  $^1\text{H}$  NMR using 1,3,5-trimethoxybenzene as an internal standard.

**<sup>1</sup>H NMR spectra of the crude reaction mixture of *ortho* deuteration experiment**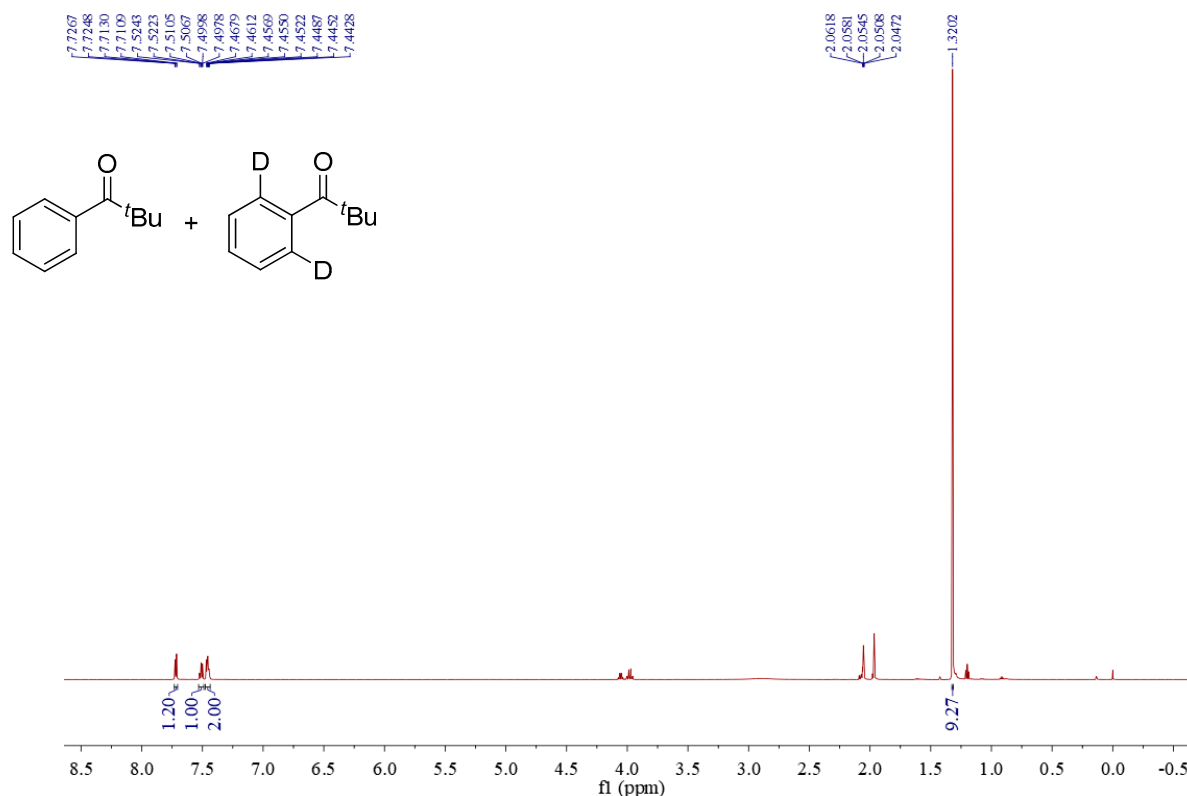

Figure S1. <sup>1</sup>H NMR spectra of crude reaction mixture of *ortho* deuteration experiment.

**3.2 KIE experiment (parallel experiments)**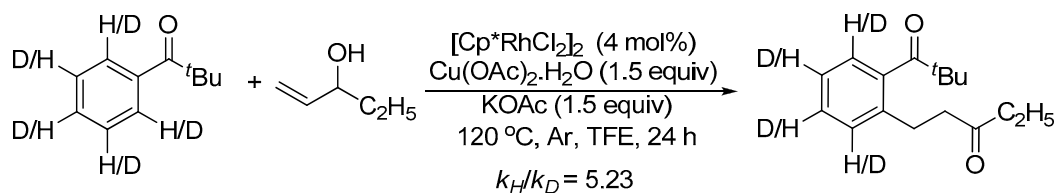

$[\text{Cp}^*\text{RhCl}_2]_2$  ( $\text{Rh}^*$ , 2.5 mg, 4 mol%, 0.004 mmol),  $\text{Cu}(\text{OAc})_2 \cdot \text{H}_2\text{O}$  (29.9 mg, 0.15 mmol),  $\text{KOAc}$  (14.7 mg, 0.15 mmol), 2,2-dimethylpropiophenone (0.1 mmol), 1-penten-3-ol (0.2 mmol), and TFE (0.6 mL) were successively added to a reaction vessel equipped with a stir bar. In another reaction vessel, 2,2-dimethylpropiophenone was replaced by  $D_5$ -2,2-dimethylpropiophenone (0.1 mmol). The vessel was sealed under Ar conditions. The two reactions were stirred at  $120^\circ\text{C}$  (oil bath temperature) for 20 min, 30 min, 40 min, 50 min, and 60 min, respectively. Then, the two reaction mixtures were filtered through a short silica gel column. The solvent was then removed. The KIE was determined by <sup>1</sup>H NMR using 1,3,5-trimethoxybenzene as the internal standard. Thus, the KIE was found to be 5.23.

**Table S1.** The average yields of **3a** and *D*<sub>5</sub>-**3a**.

| Entry | Time (min) | Yield of <b>3a</b> (%) | Yield of <i>D</i> <sub>5</sub> - <b>3a</b> (%) |
|-------|------------|------------------------|------------------------------------------------|
| 1     | 20         | 8.04                   | 1.88                                           |
| 2     | 30         | 13.20                  | 3.04                                           |
| 3     | 40         | 18.94                  | 4.04                                           |
| 4     | 50         | 22.49                  | 5.08                                           |
| 5     | 60         | 29.37                  | 5.83                                           |

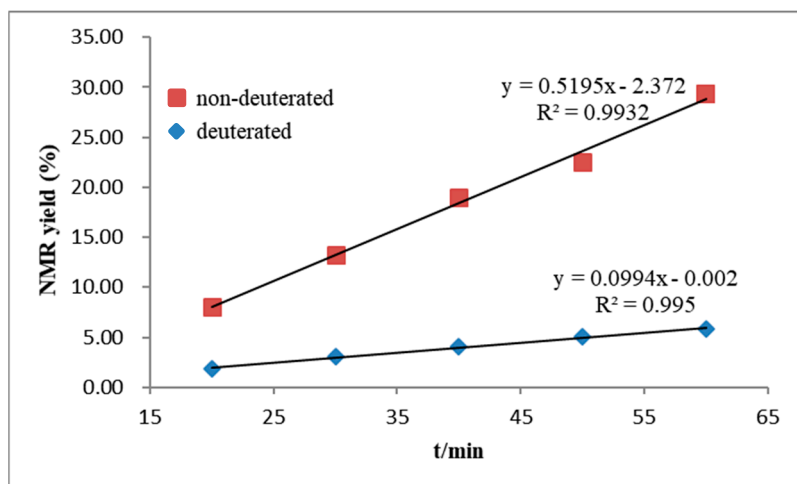

## 4. Copies of NMR spectra

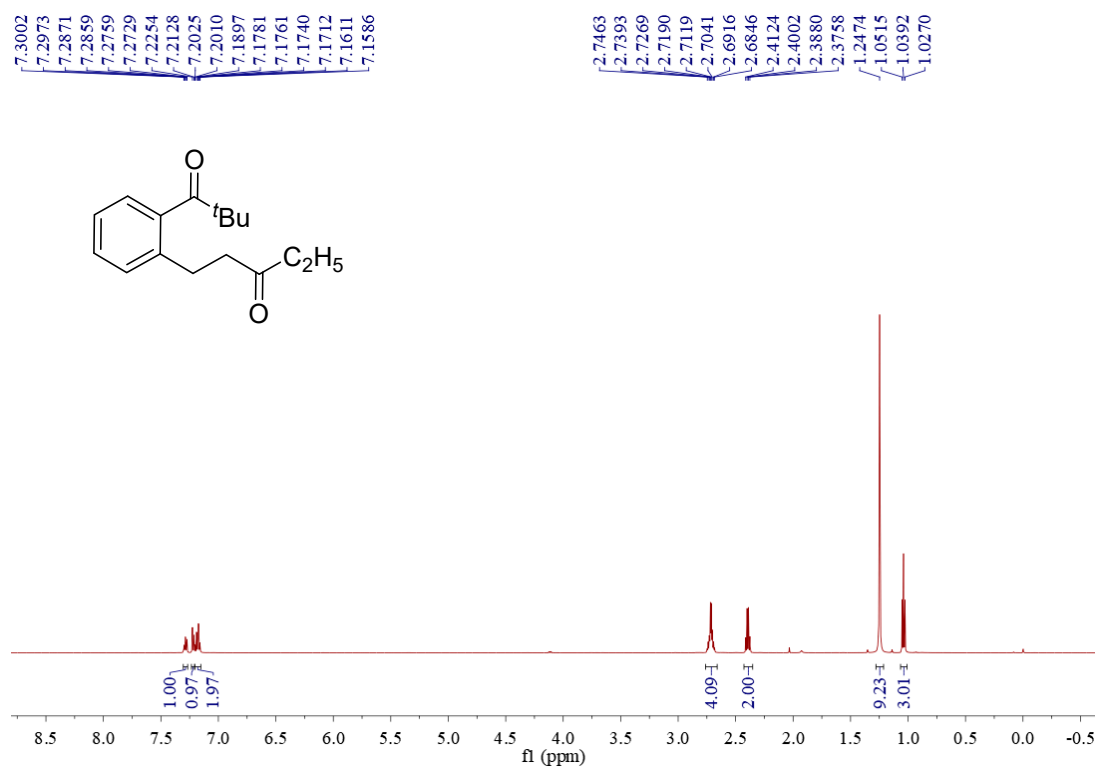

Figure S2. <sup>1</sup>H NMR spectra of compound 3a.

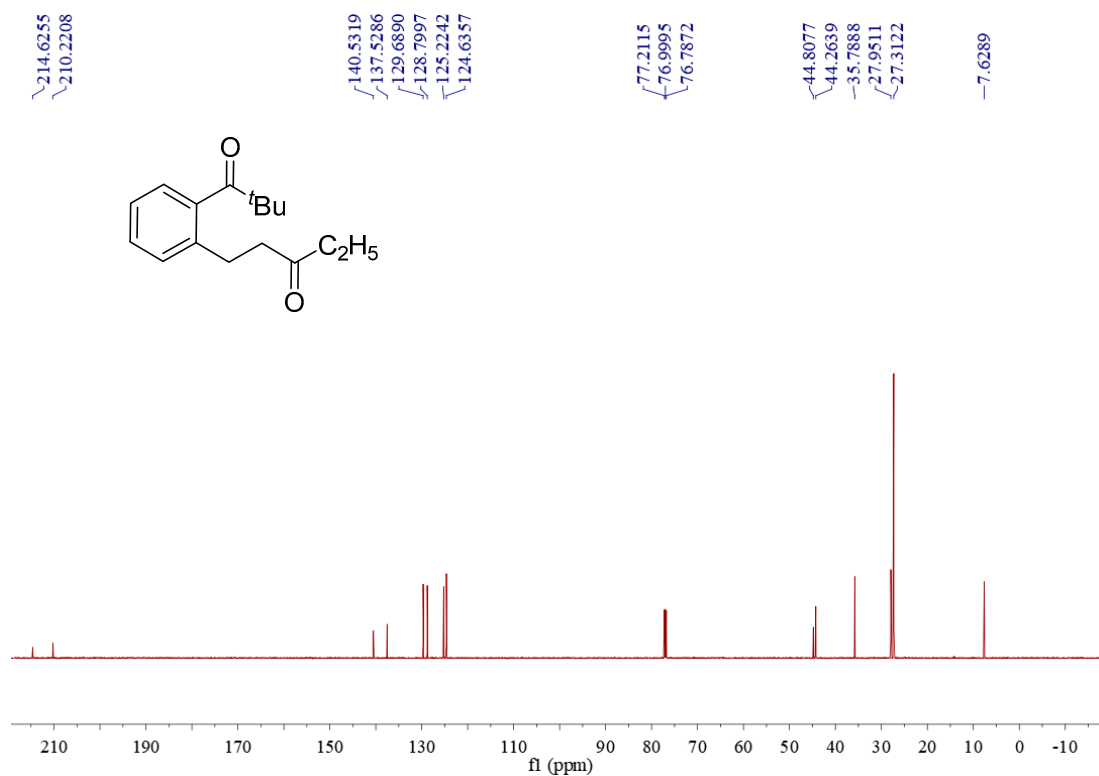

Figure S3. <sup>13</sup>C NMR spectra of compound 3a.

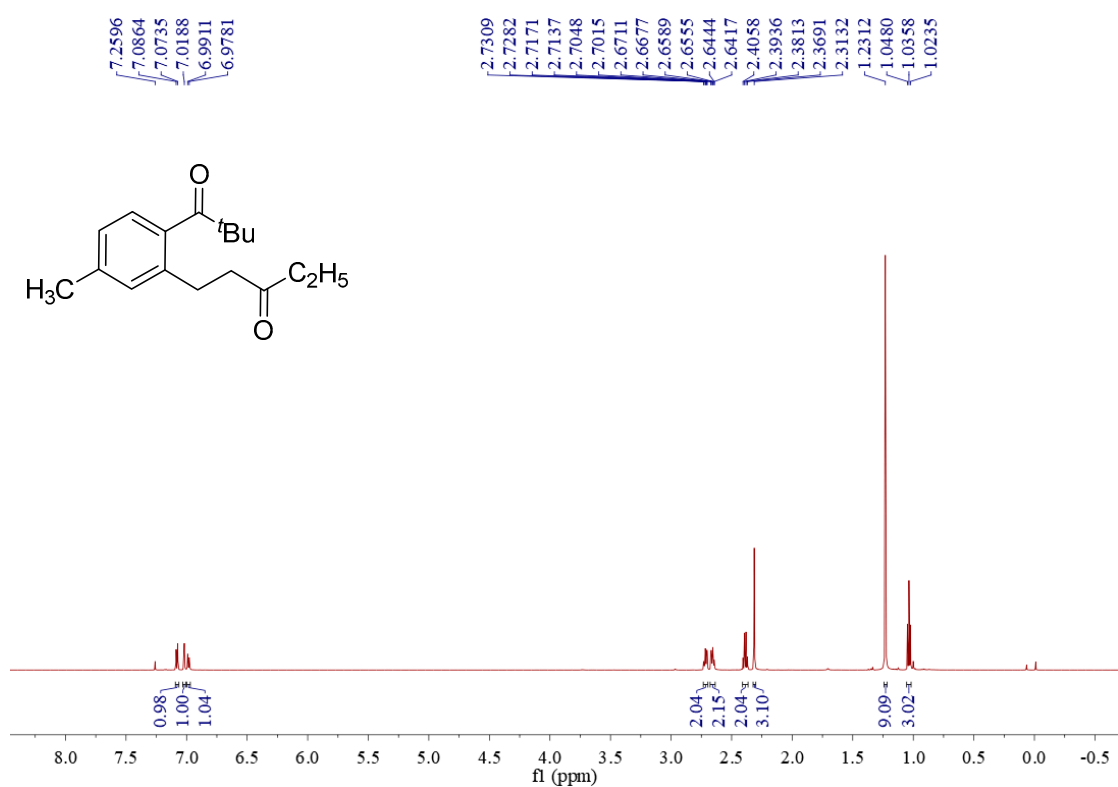Figure S4. <sup>1</sup>H NMR spectra of compound **3b**.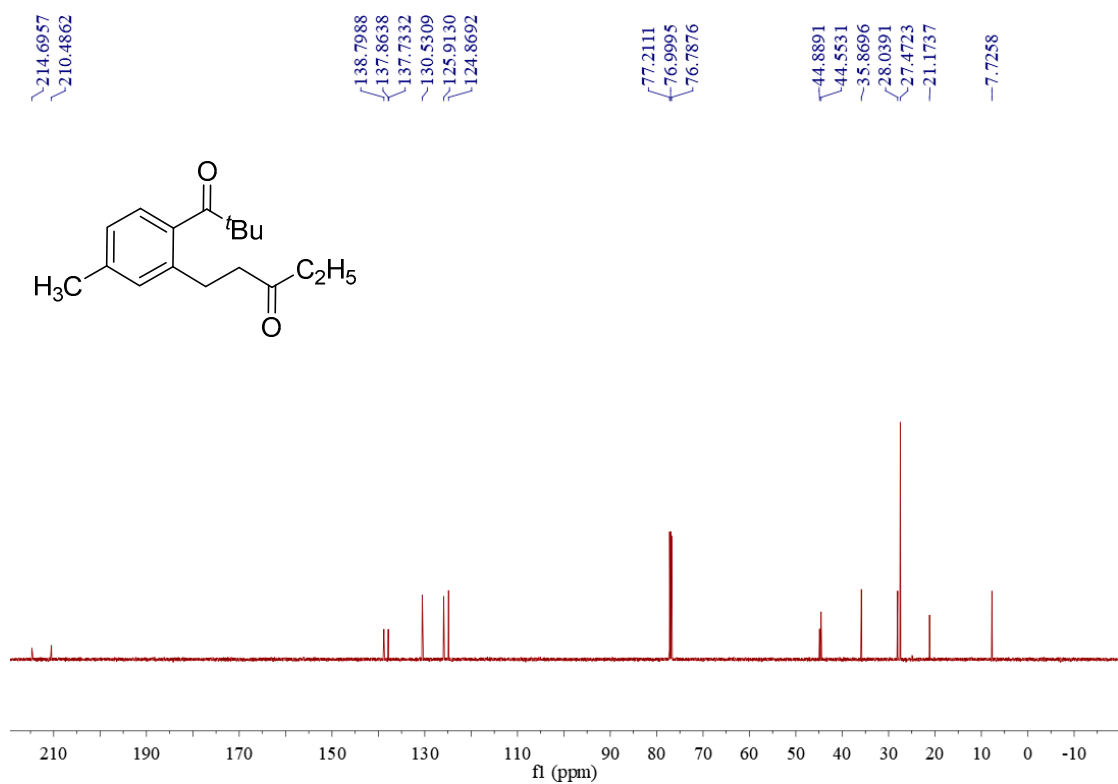Figure S5. <sup>13</sup>C NMR spectra of compound **3b**.

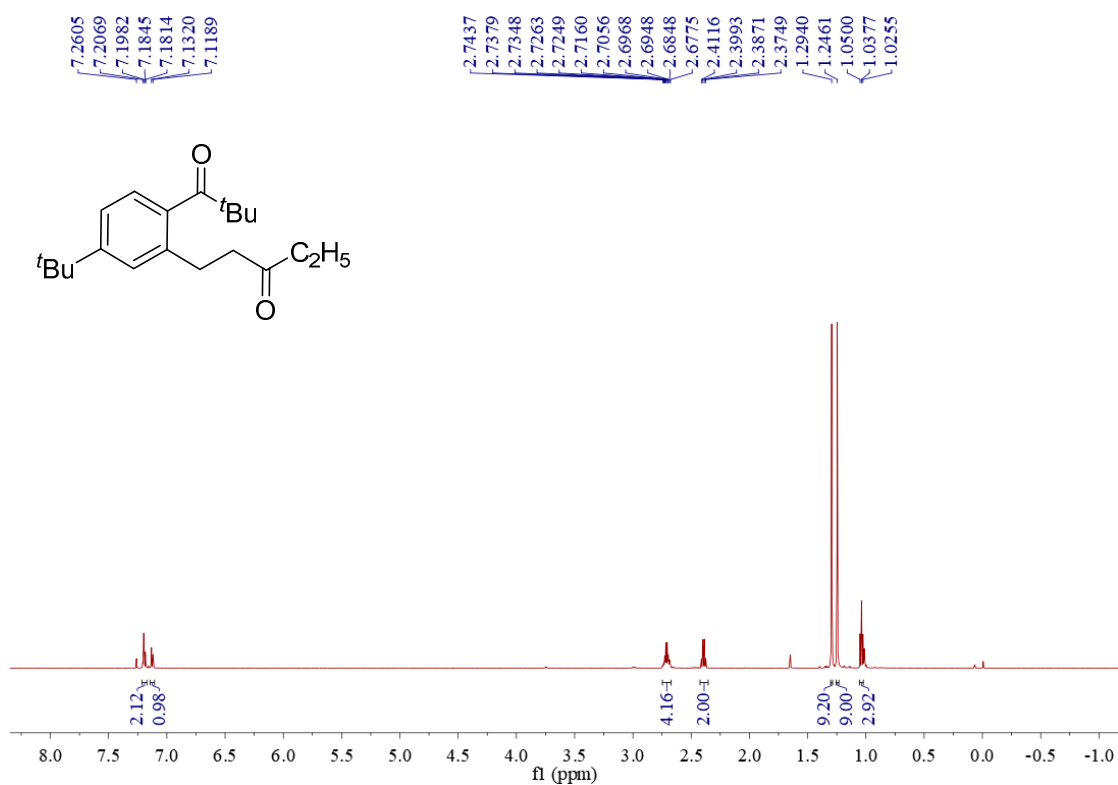Figure S6. <sup>1</sup>H NMR spectra of compound 3c.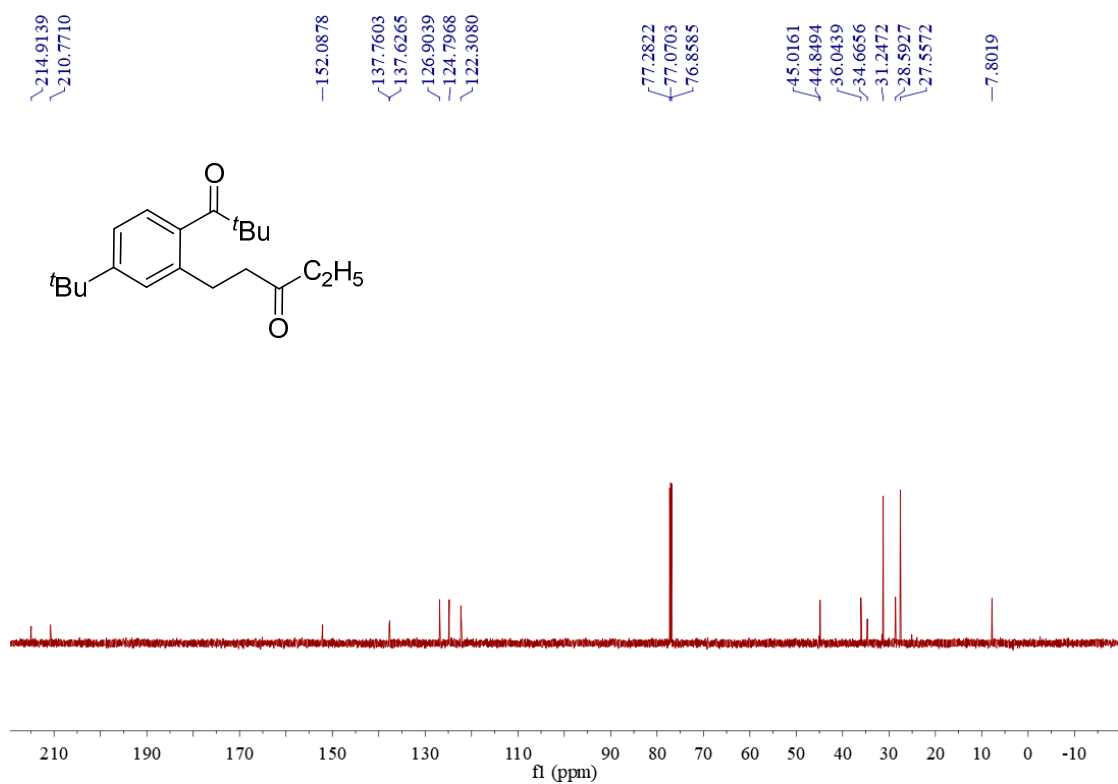Figure S7. <sup>13</sup>C NMR spectra of compound 3c.

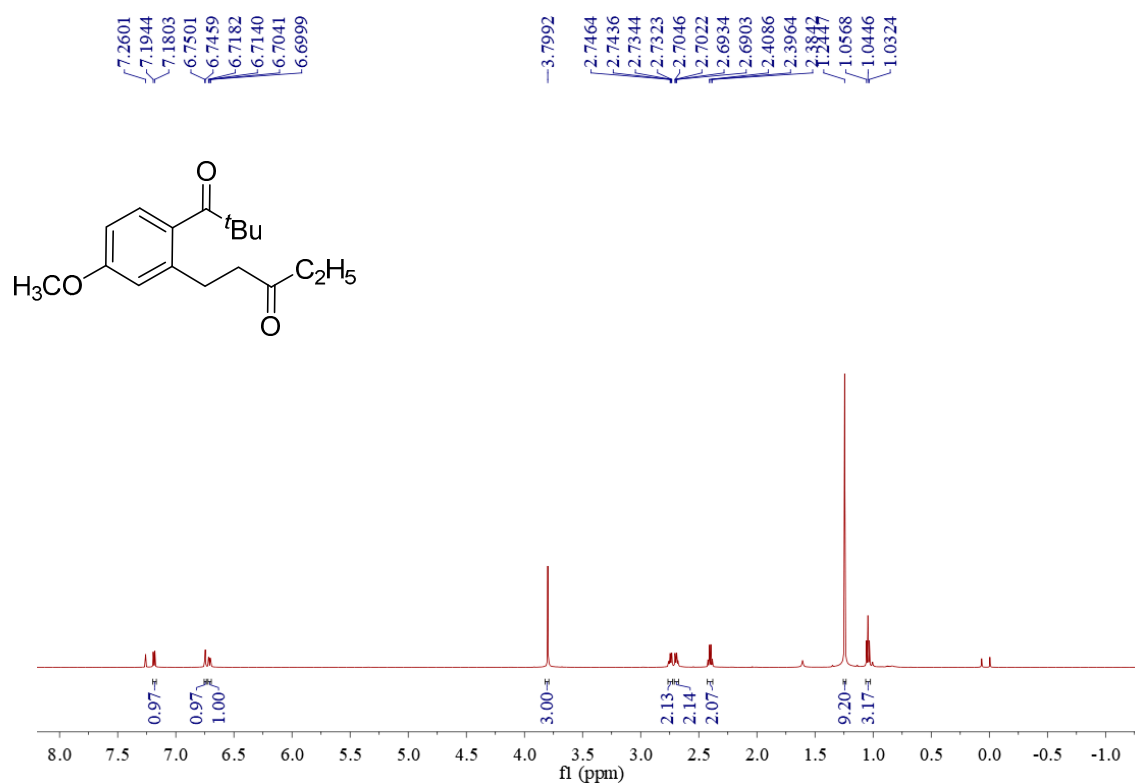Figure S8. <sup>1</sup>H NMR spectra of compound 3d.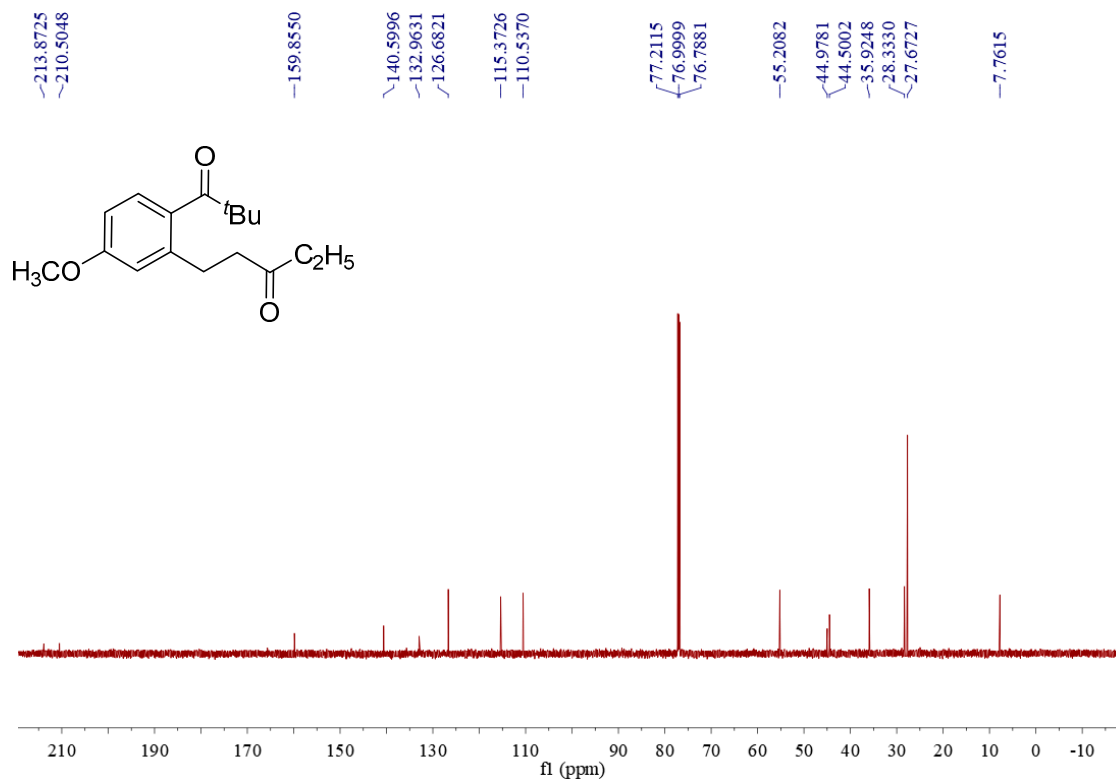Figure S9. <sup>13</sup>C NMR spectra of compound 3d.



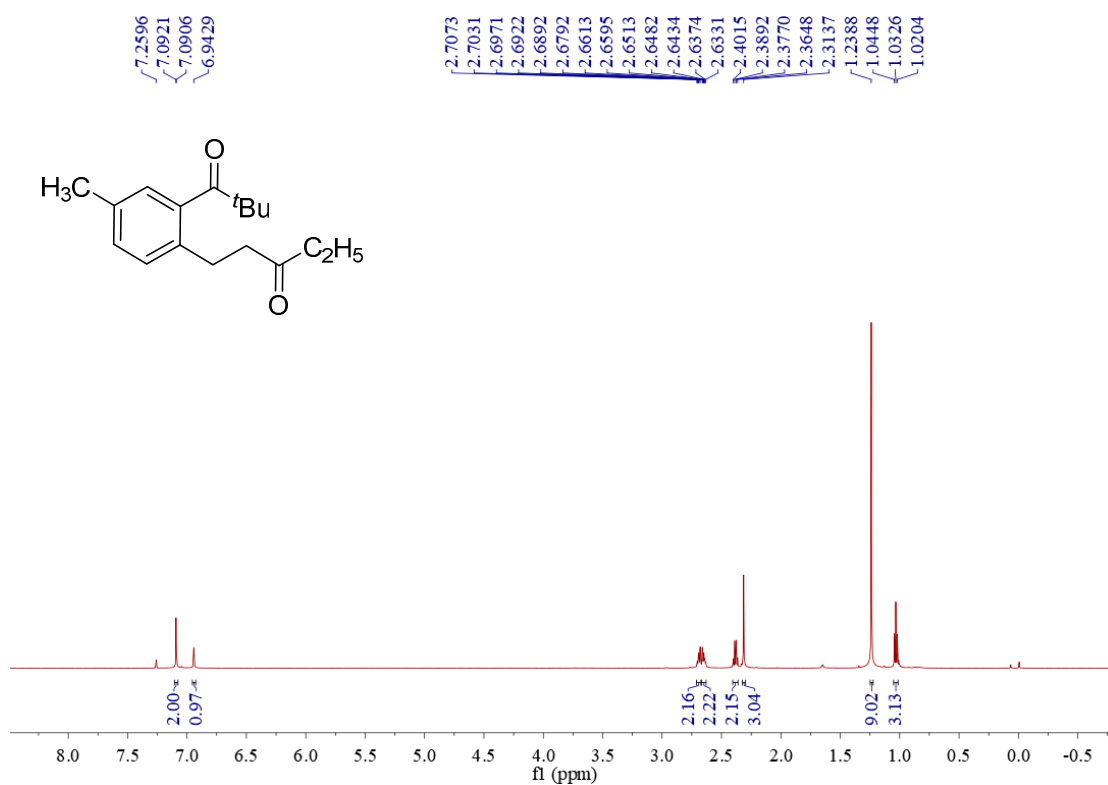Figure S10. <sup>1</sup>H NMR spectra of compound 3e.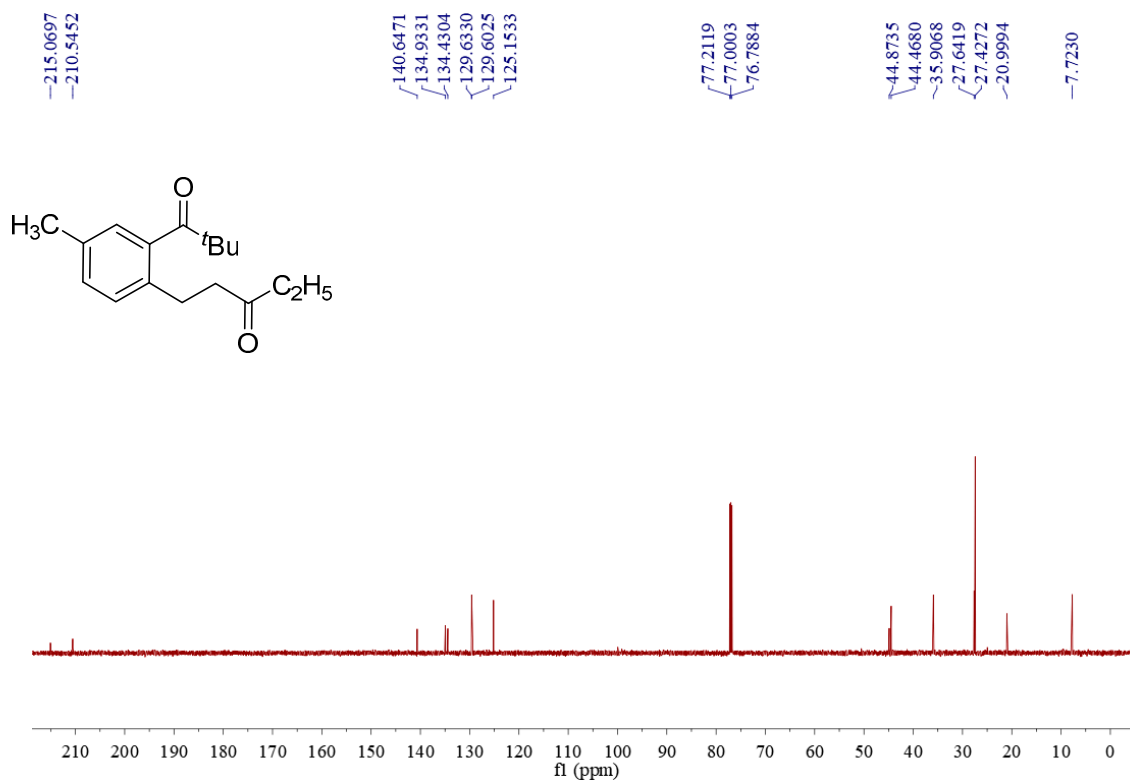Figure S11. <sup>13</sup>C NMR spectra of compound 3e.

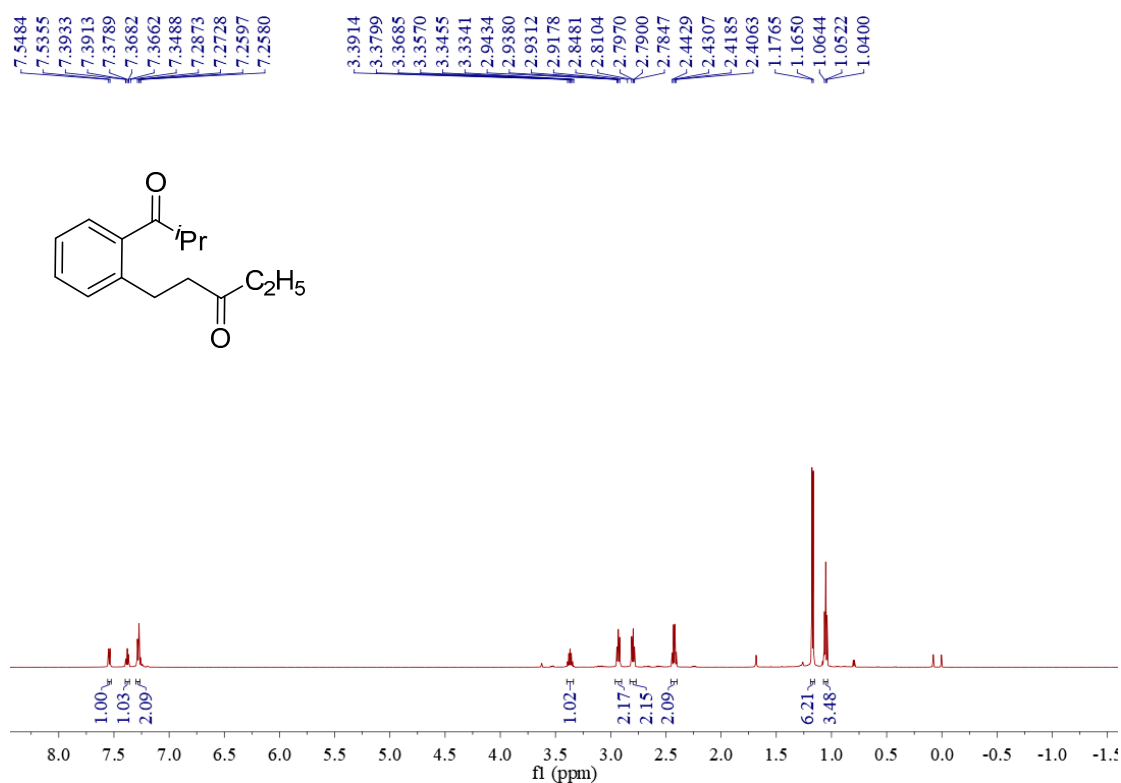Figure S12. <sup>1</sup>H NMR spectra of compound 3f.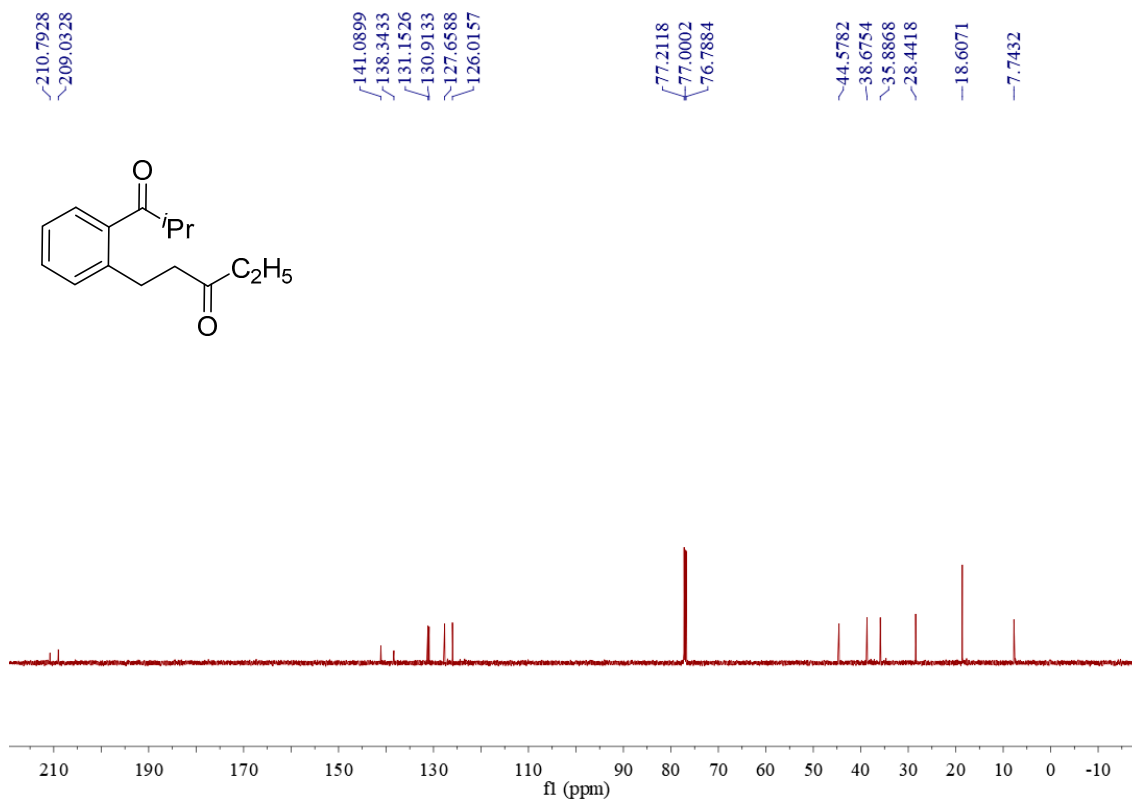Figure S13. <sup>13</sup>C NMR spectra of compound 3f.

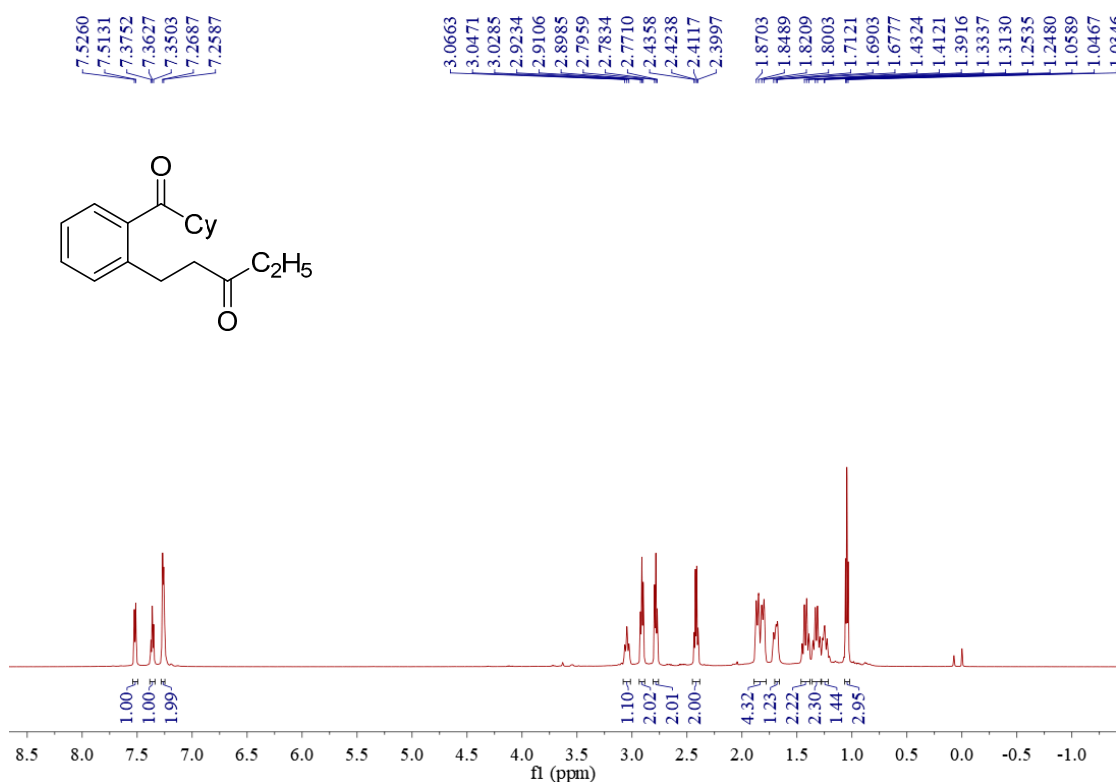Figure S14. <sup>1</sup>H NMR spectra of compound 3g.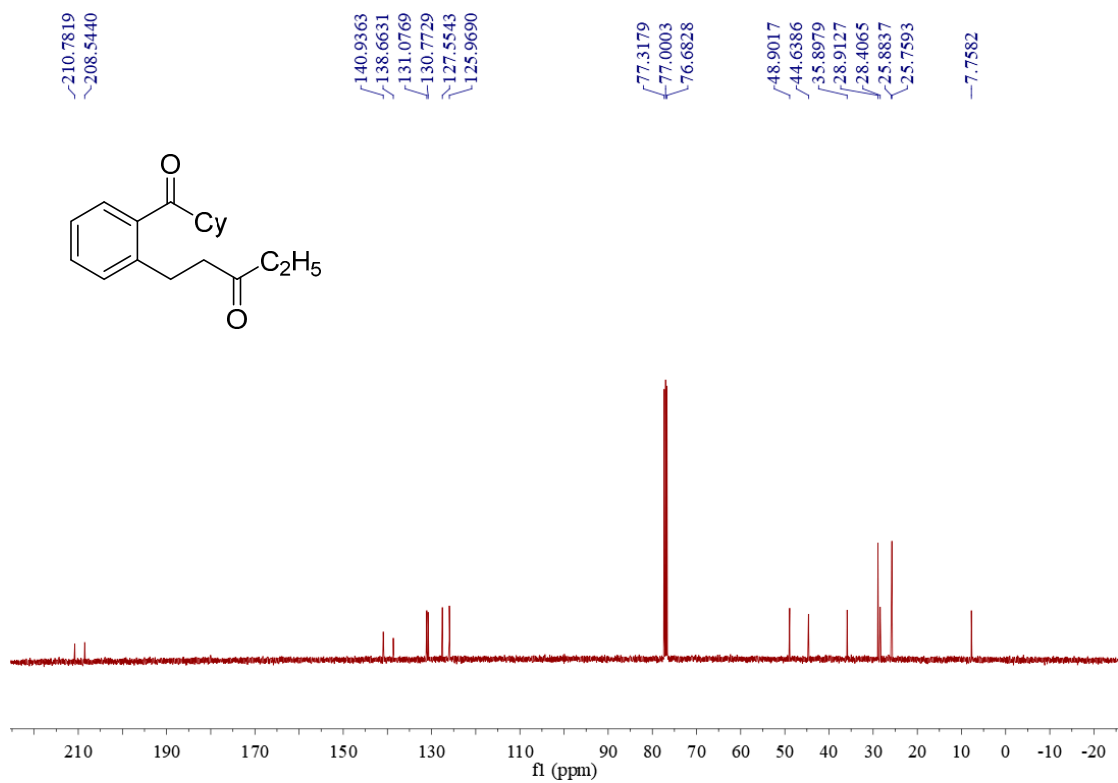Figure S15. <sup>13</sup>C NMR spectra of compound 3g.

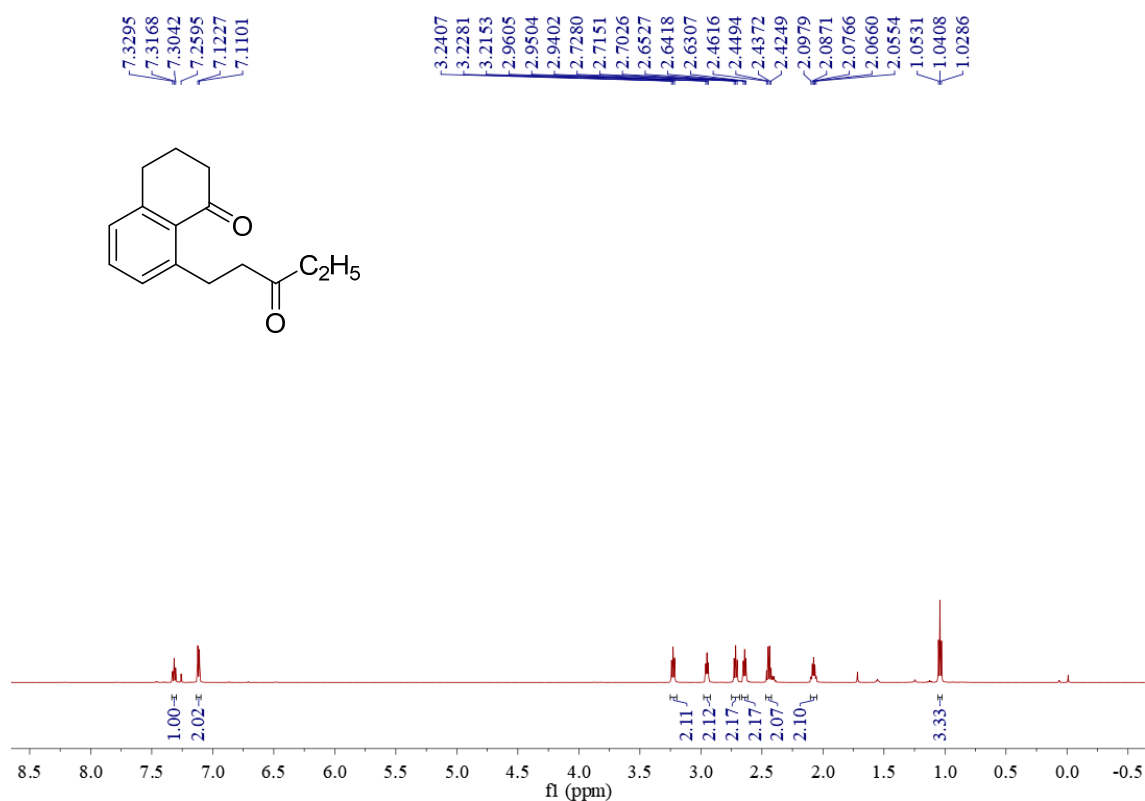Figure S16. <sup>1</sup>H NMR spectra of compound 3h.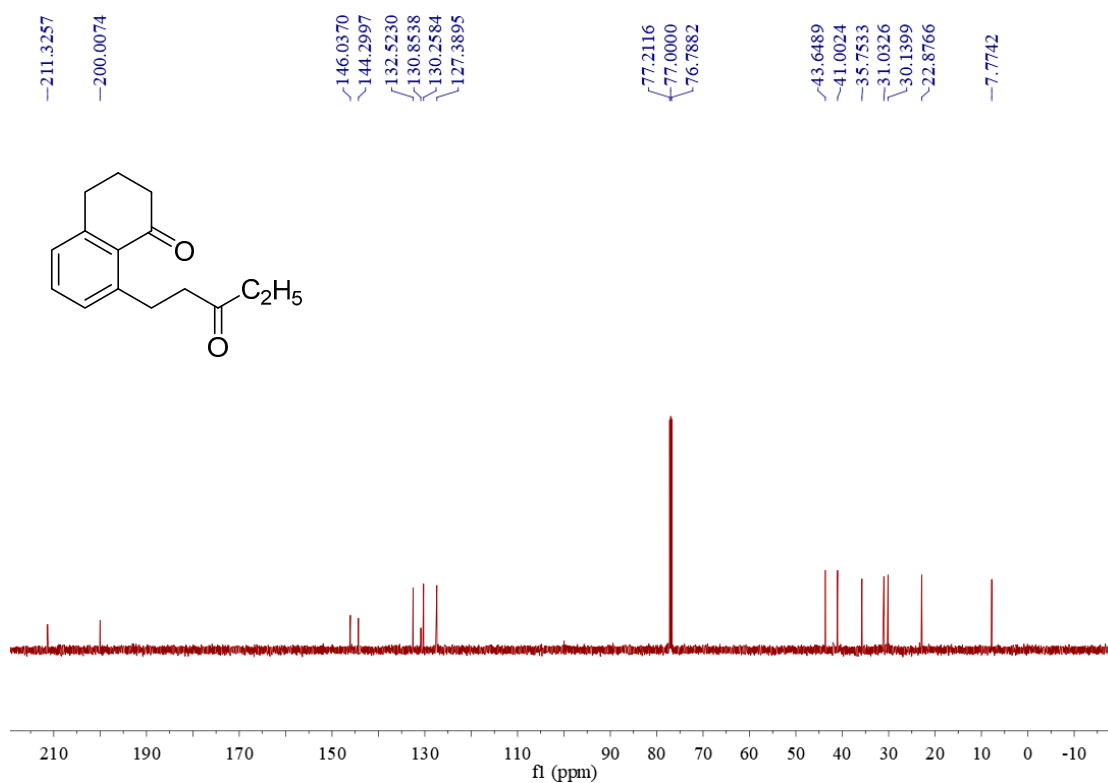Figure S17. <sup>13</sup>C NMR spectra of compound 3h.

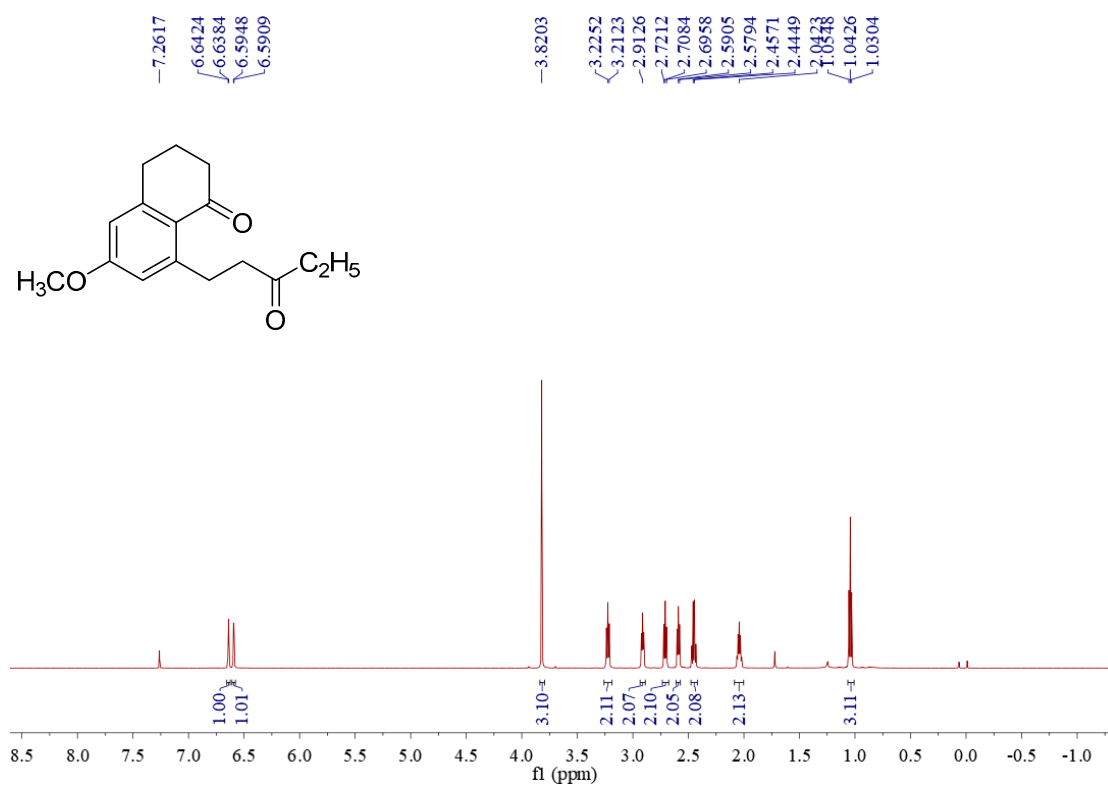Figure S18.  $^1\text{H}$  NMR spectra of compound **3i**.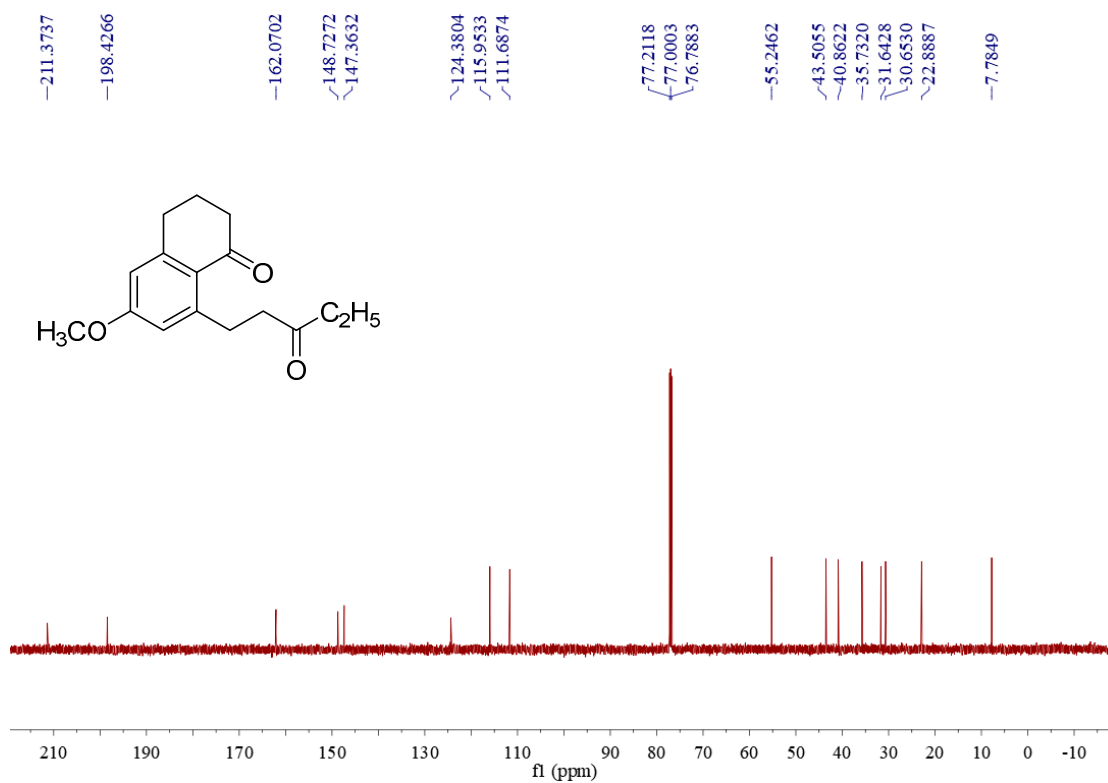Figure S19.  $^{13}\text{C}$  NMR spectra of compound **3i**.

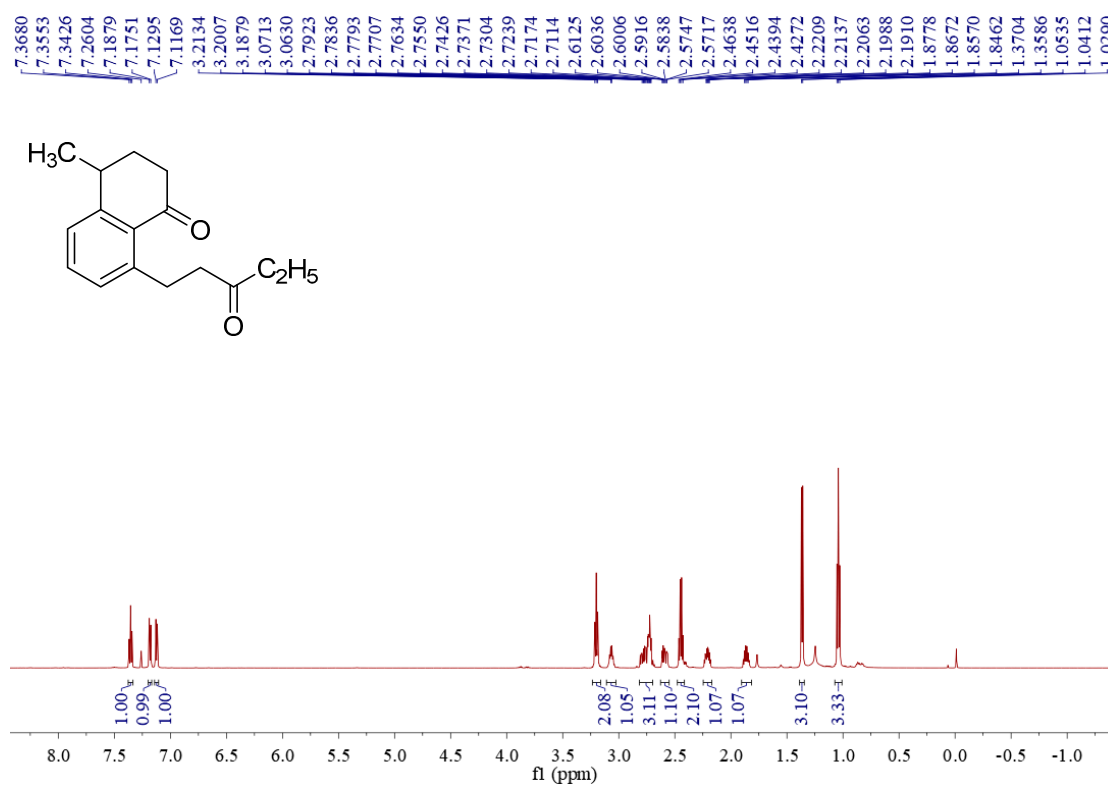Figure S20. <sup>1</sup>H NMR spectra of compound 3j.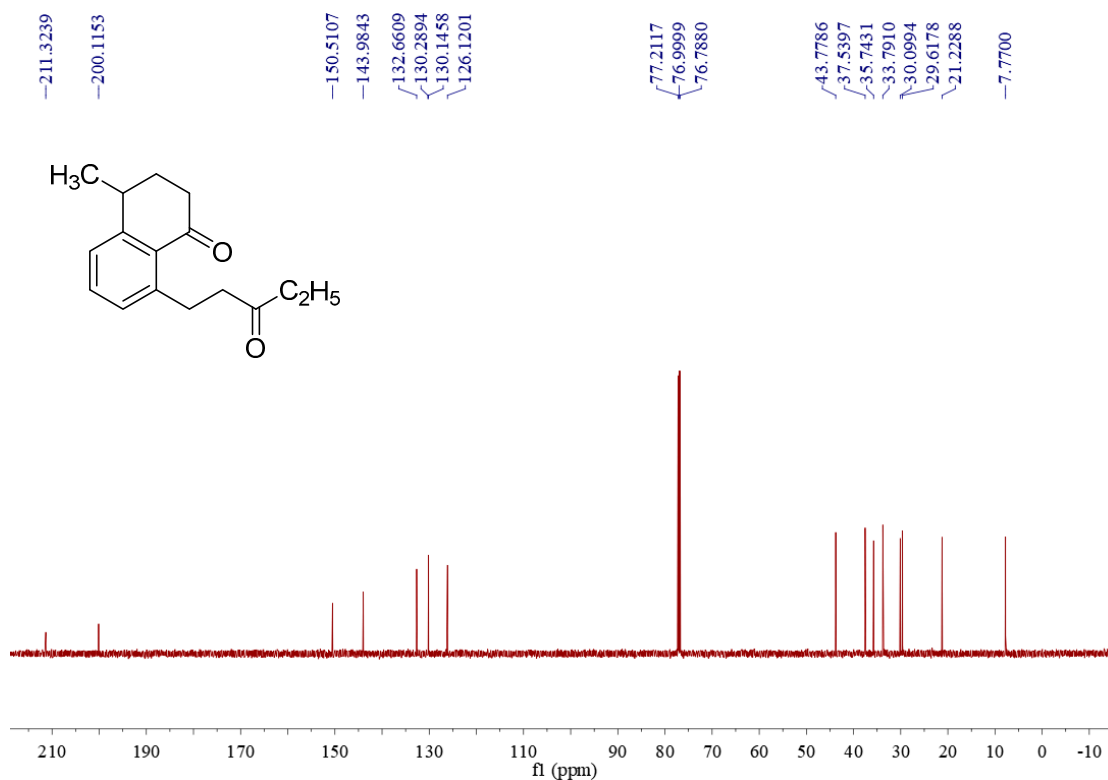Figure S21. <sup>13</sup>C NMR spectra of compound 3j.

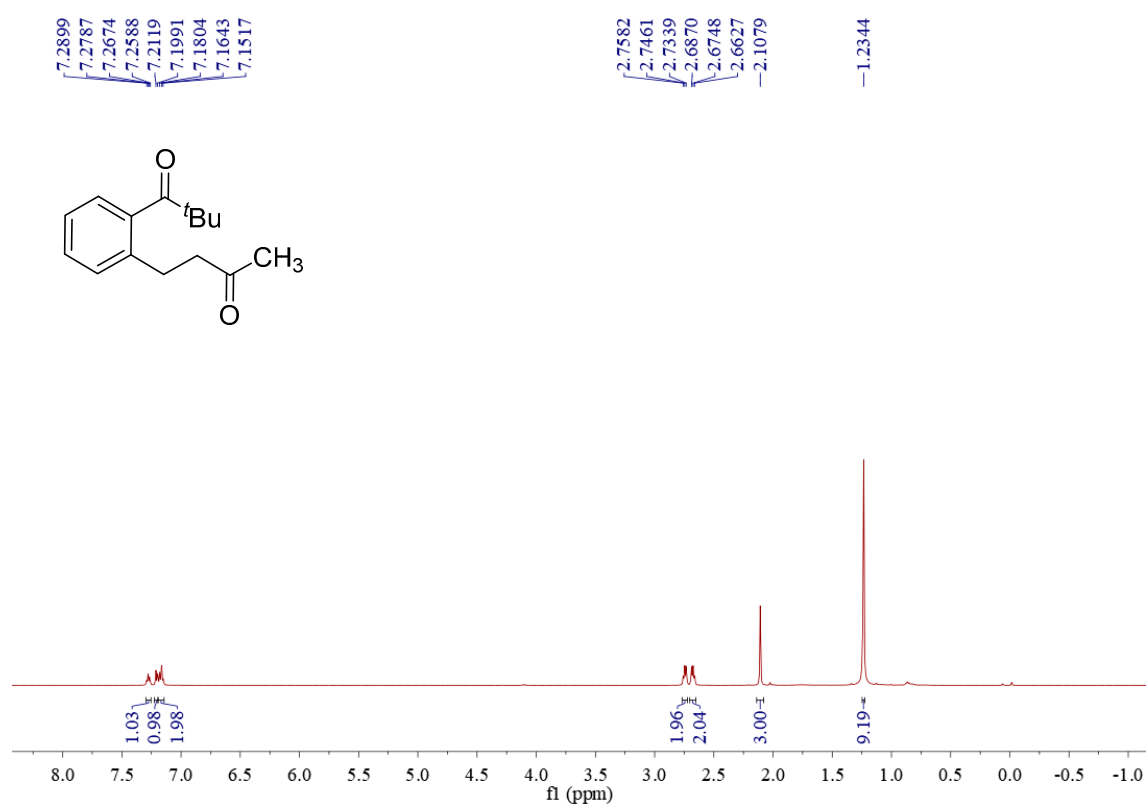Figure S22. <sup>1</sup>H NMR spectra of compound 3k.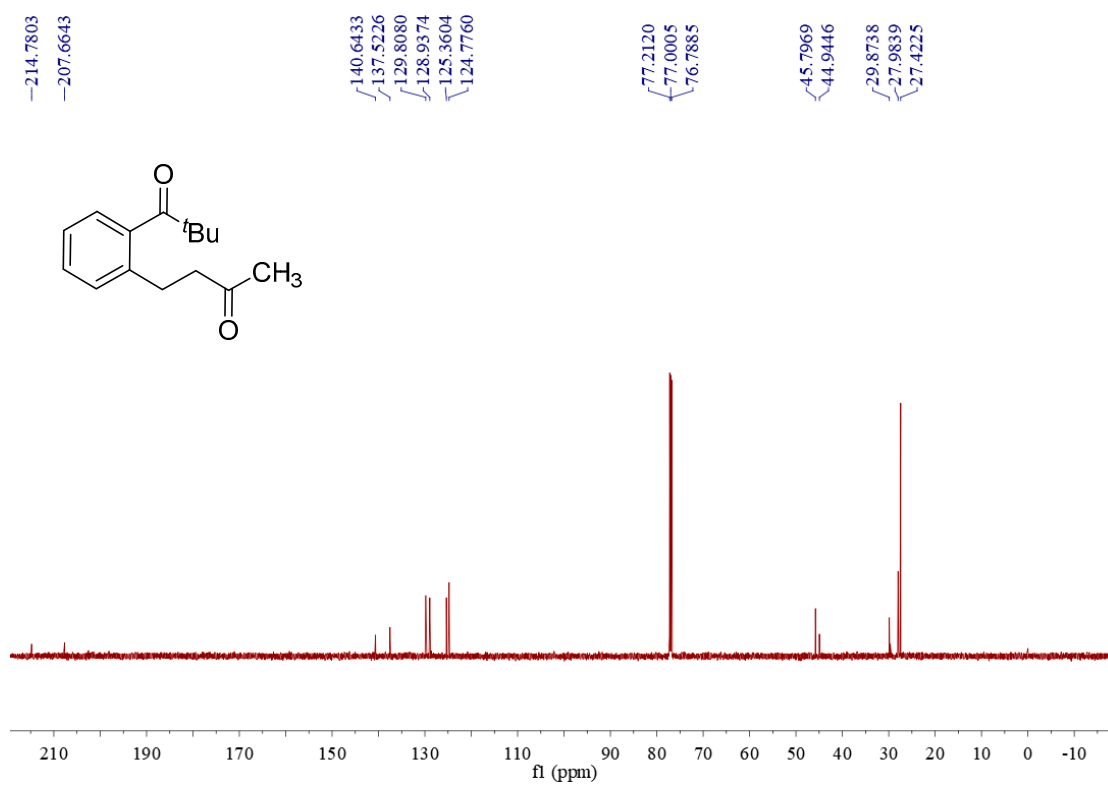Figure S23. <sup>13</sup>C NMR spectra of compound 3k.

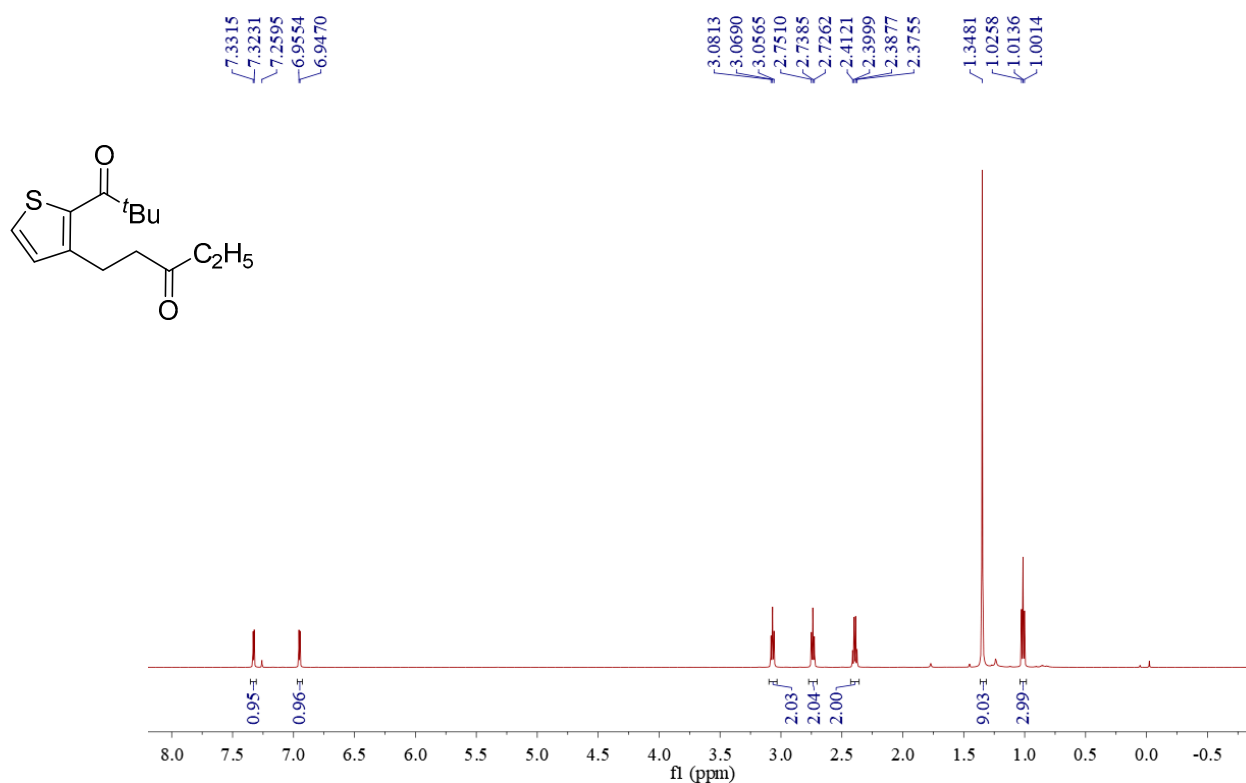Figure S24. <sup>1</sup>H NMR spectra of compound 3l.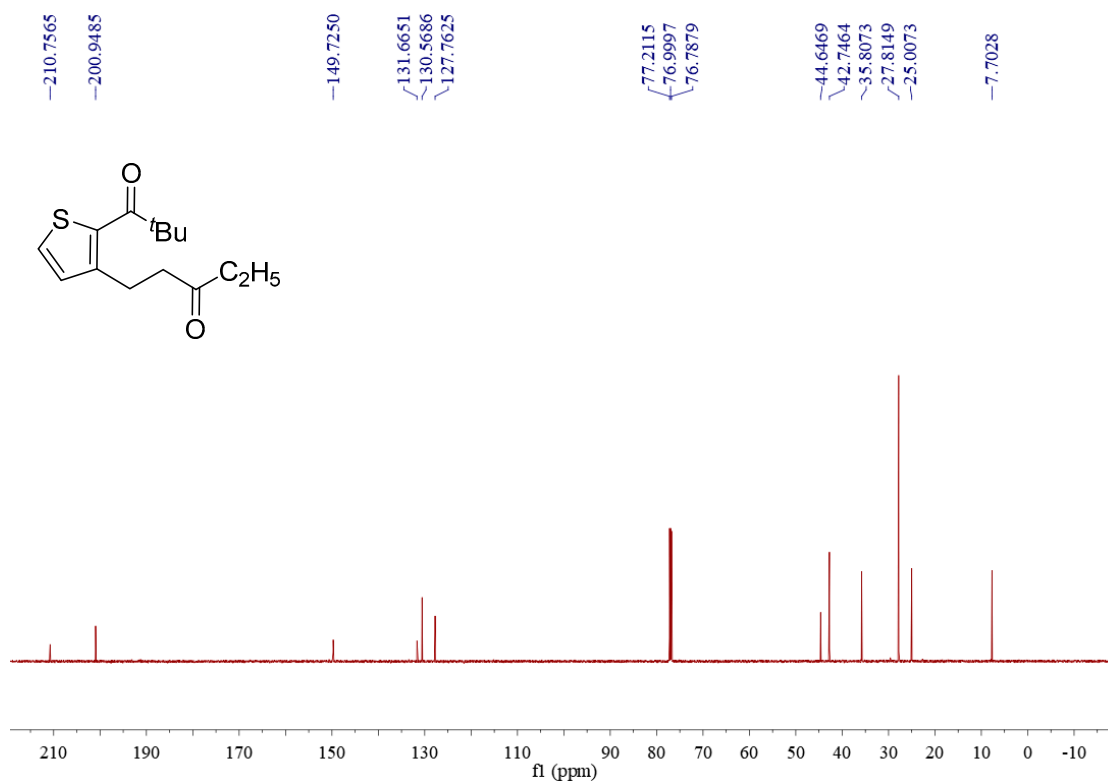Figure S25. <sup>13</sup>C NMR spectra of compound 3l.



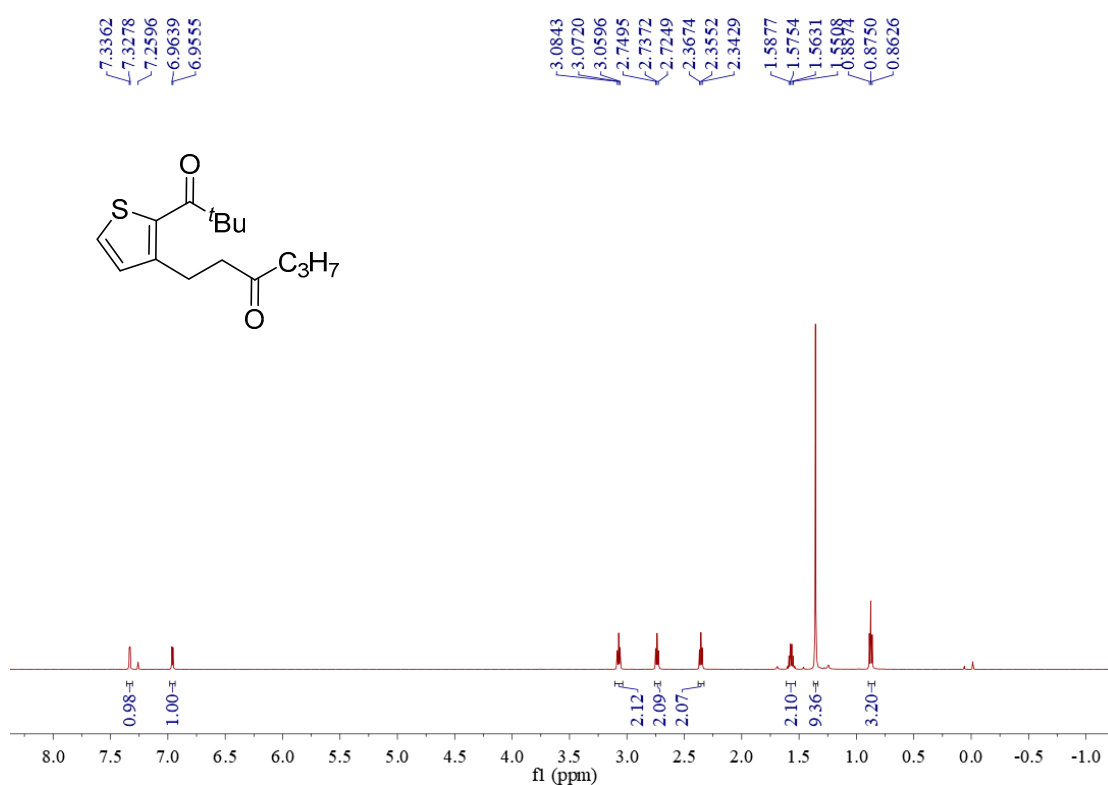Figure S26.  $^1\text{H}$  NMR spectra of compound **3m**.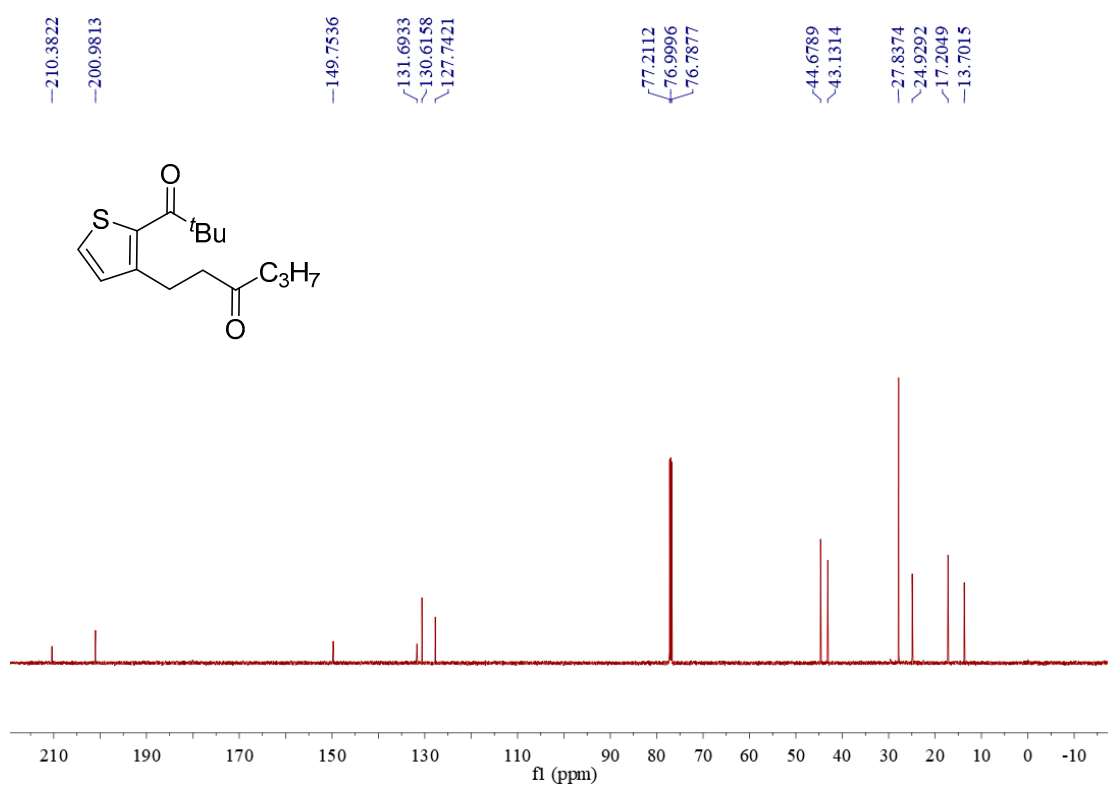Figure S27.  $^{13}\text{C}$  NMR spectra of compound **3m**.

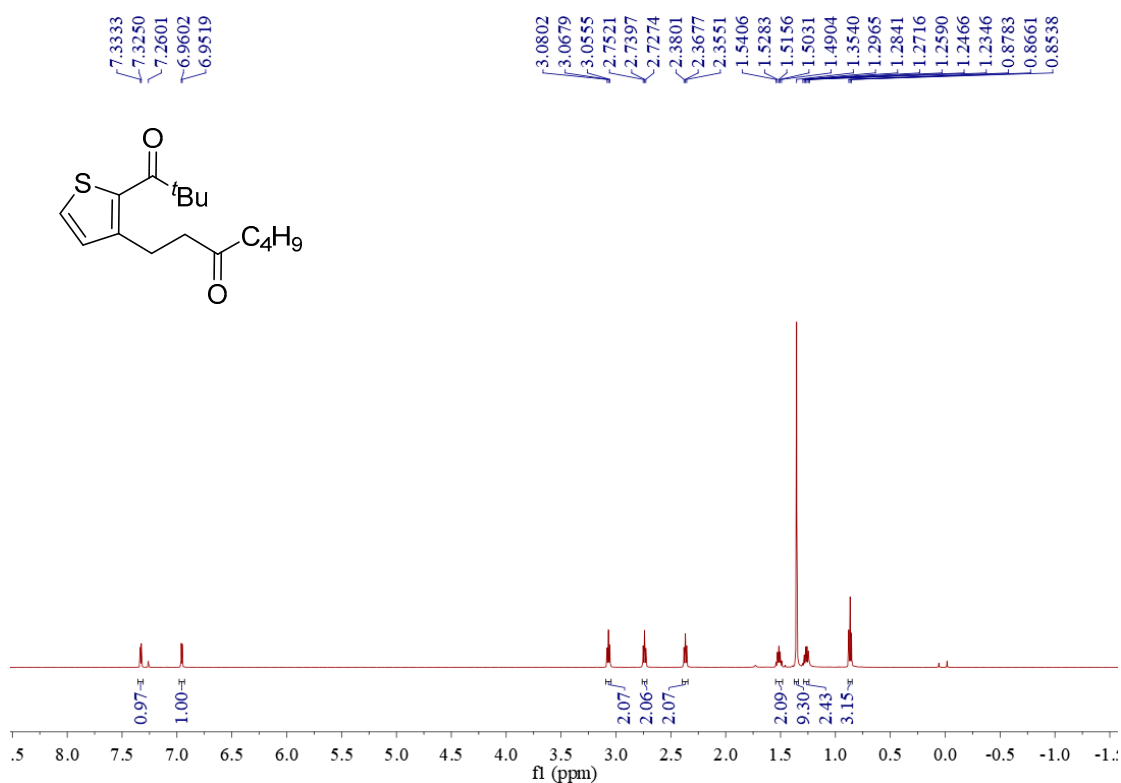Figure S28. <sup>1</sup>H NMR spectra of compound 3n.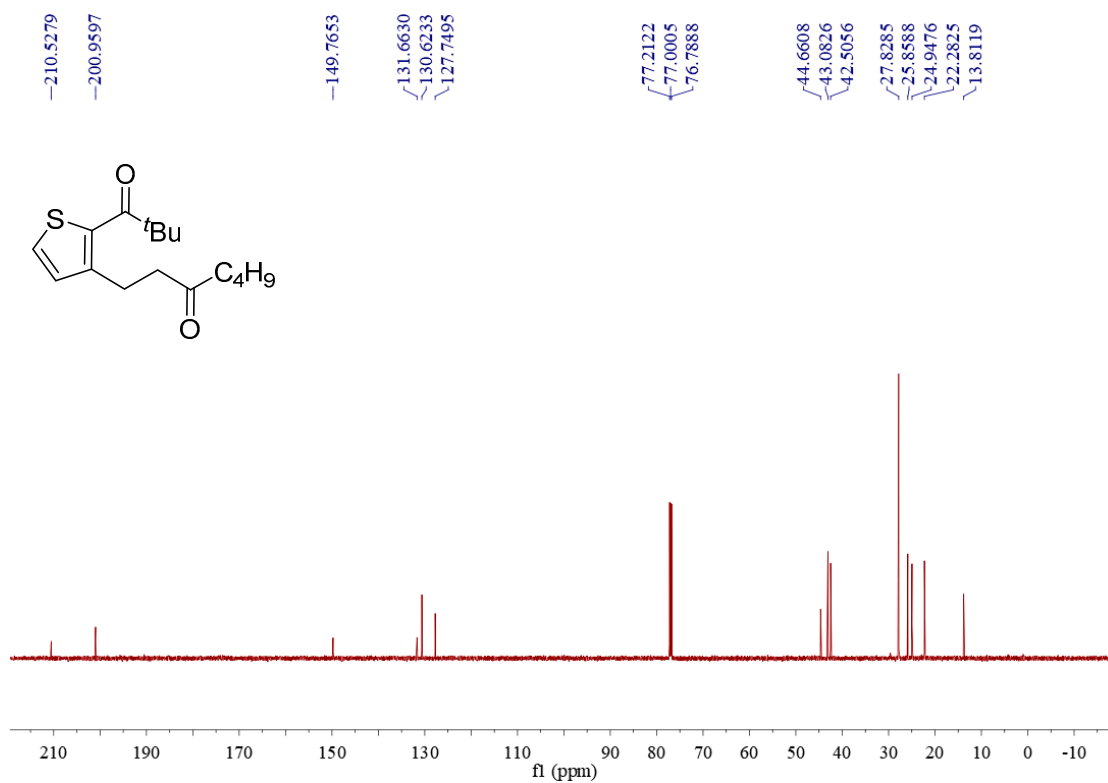Figure S29. <sup>13</sup>C NMR spectra of compound 3n.

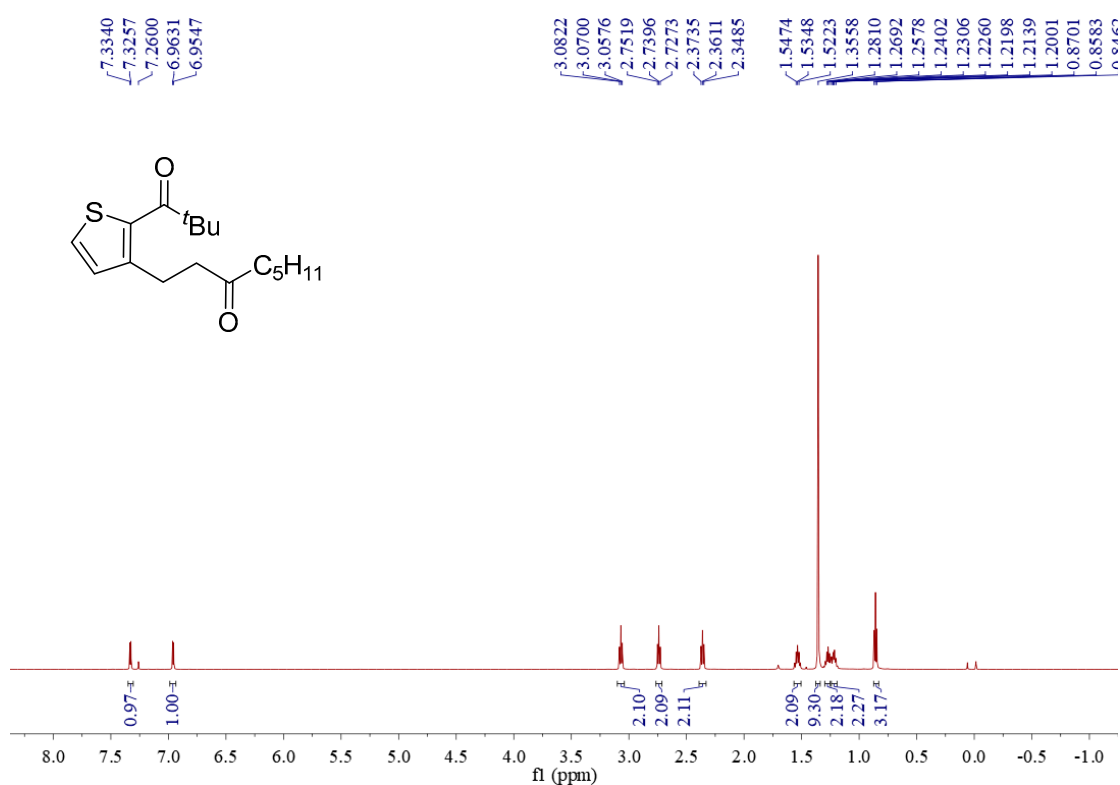Figure S30. <sup>1</sup>H NMR spectra of compound **3o**.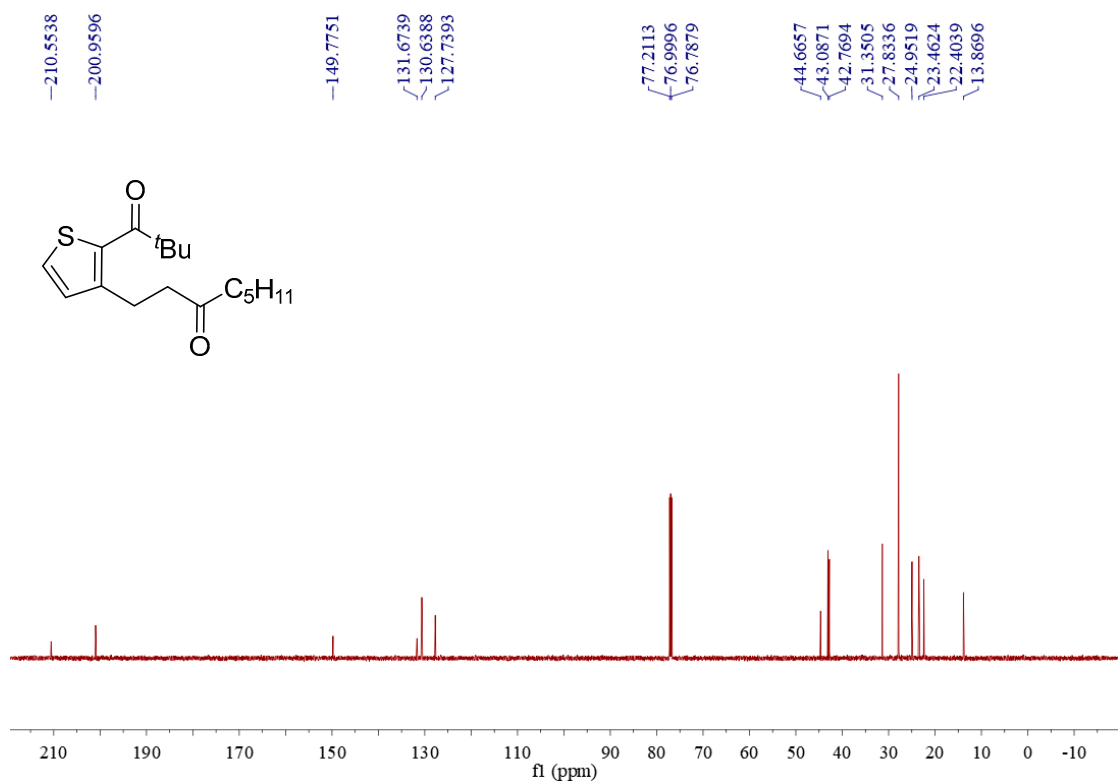Figure S31. <sup>13</sup>C NMR spectra of compound **3o**.

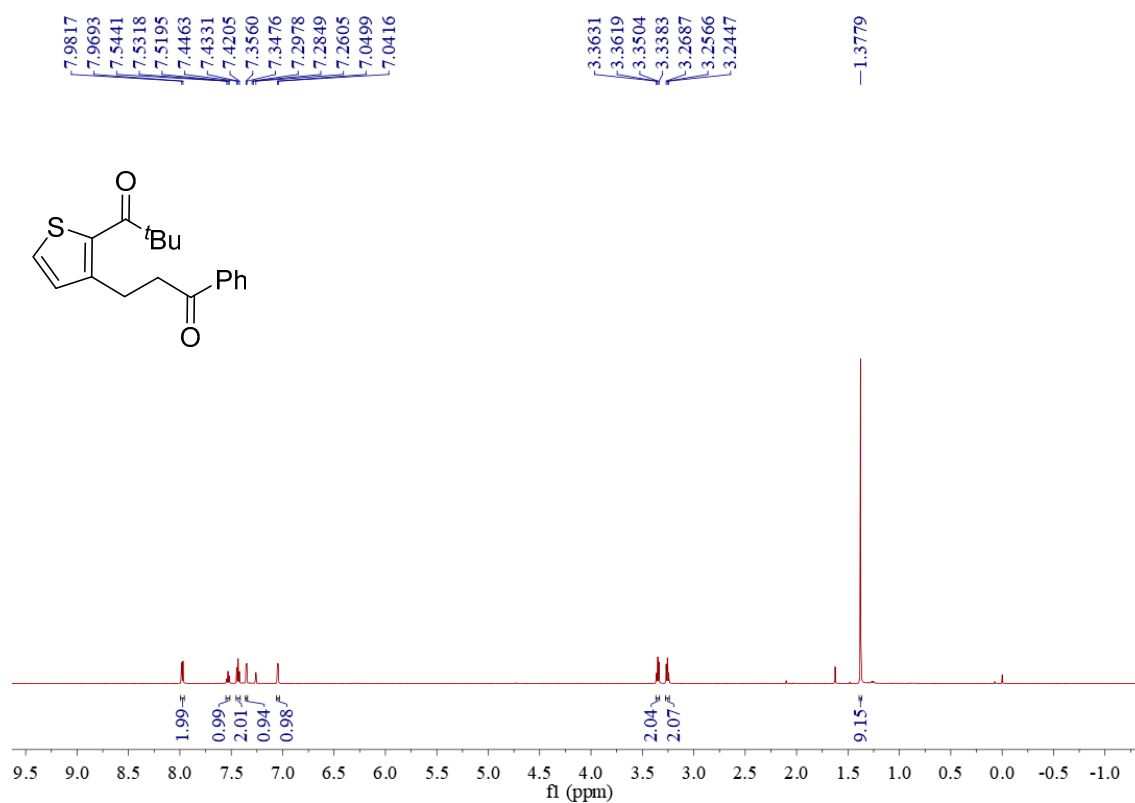Figure S32. <sup>1</sup>H NMR spectra of compound 3p.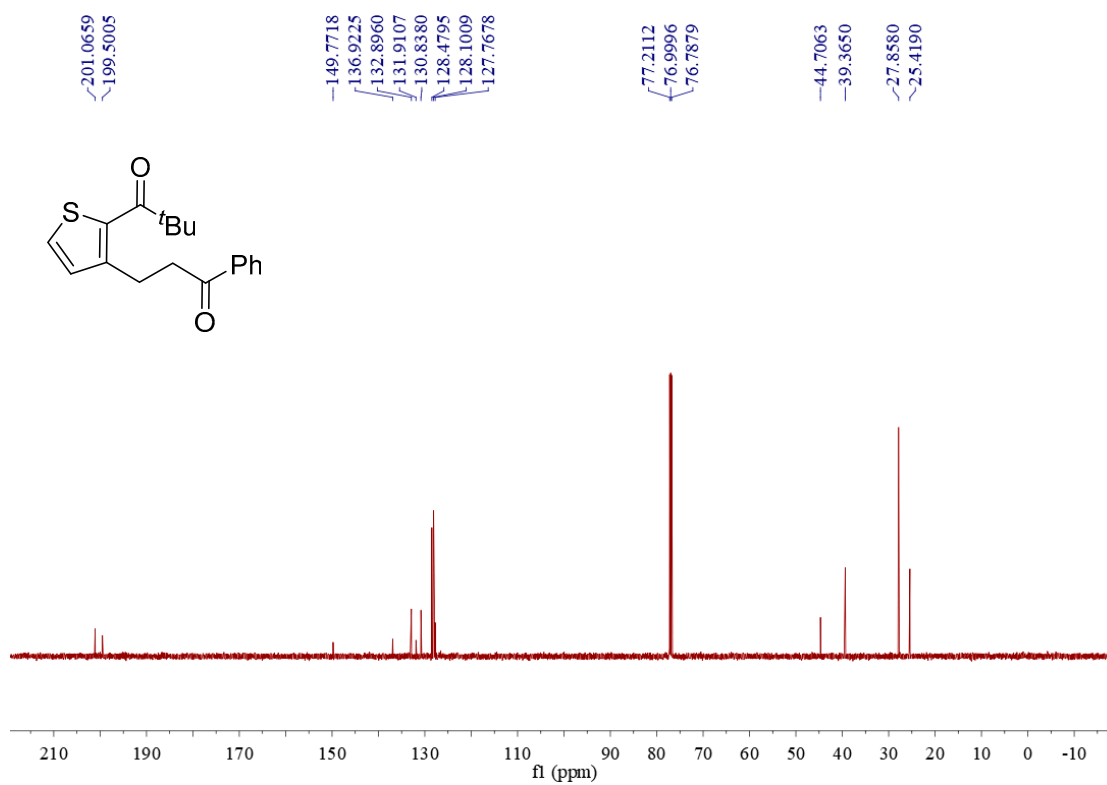Figure S33. <sup>13</sup>C NMR spectra of compound 3p.

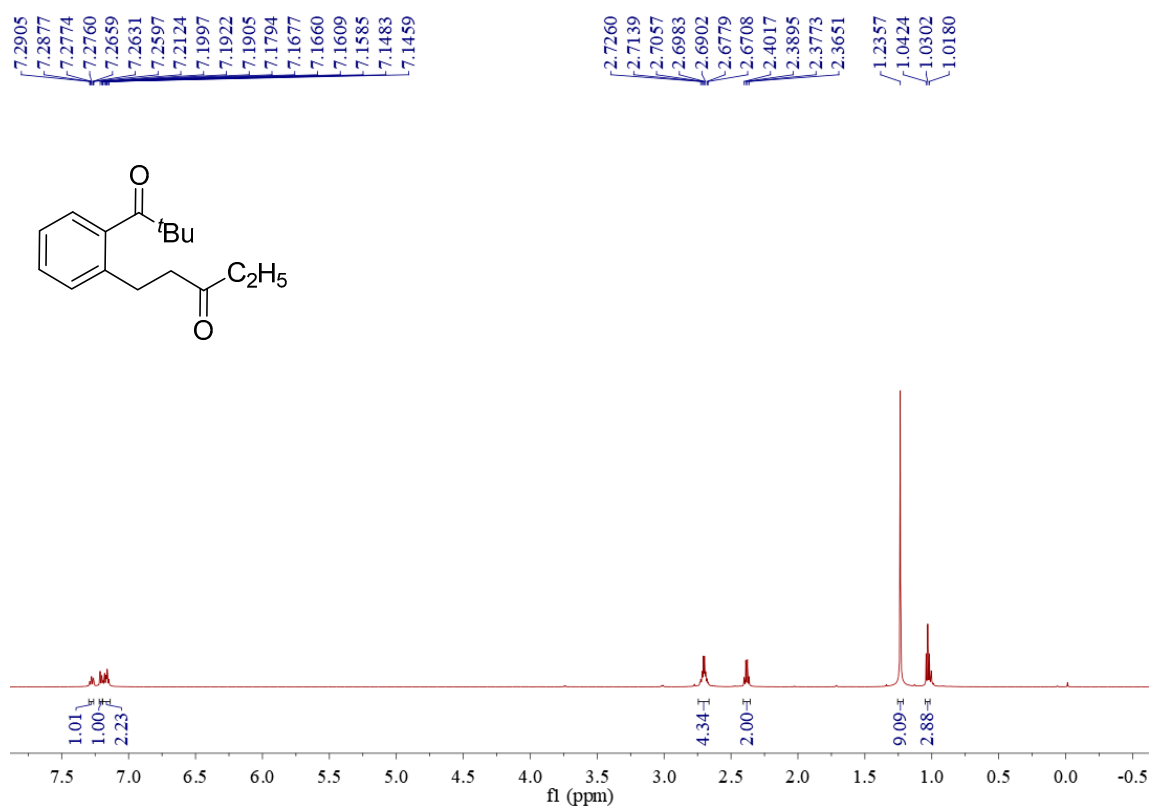Figure S34. <sup>1</sup>H NMR spectra of compound 4a.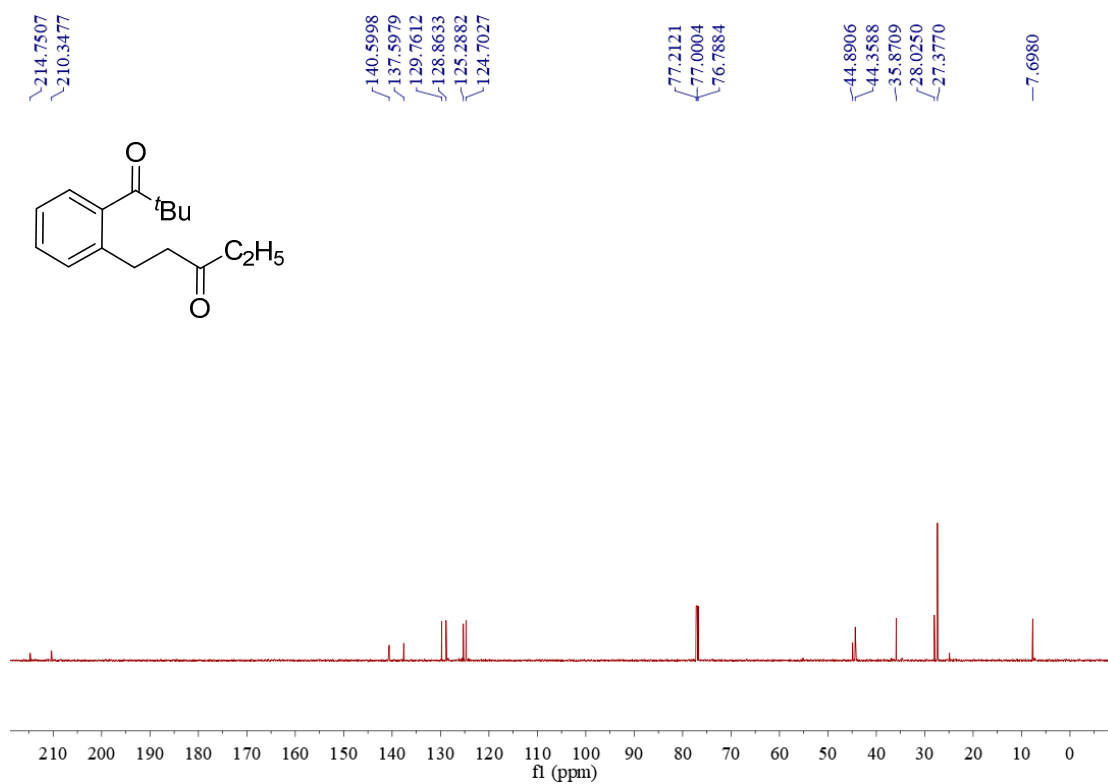Figure S35. <sup>13</sup>C NMR spectra of compound 4a.

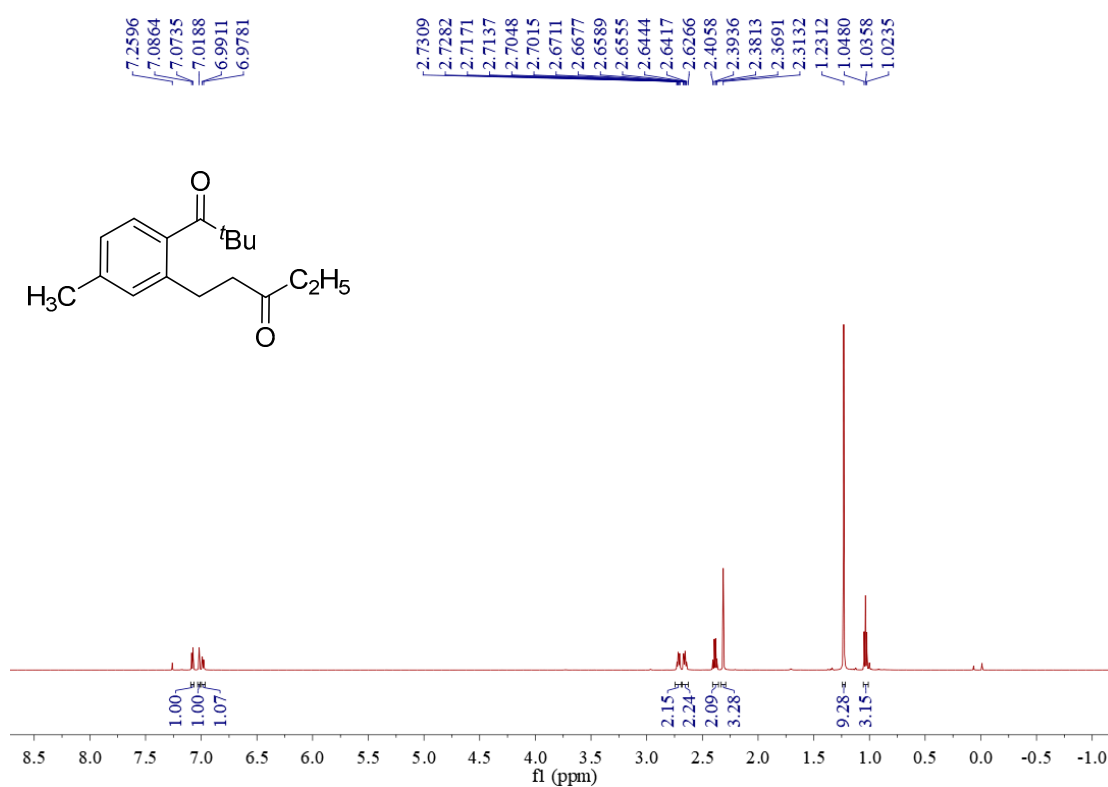Figure S36. <sup>1</sup>H NMR spectra of compound **4b**.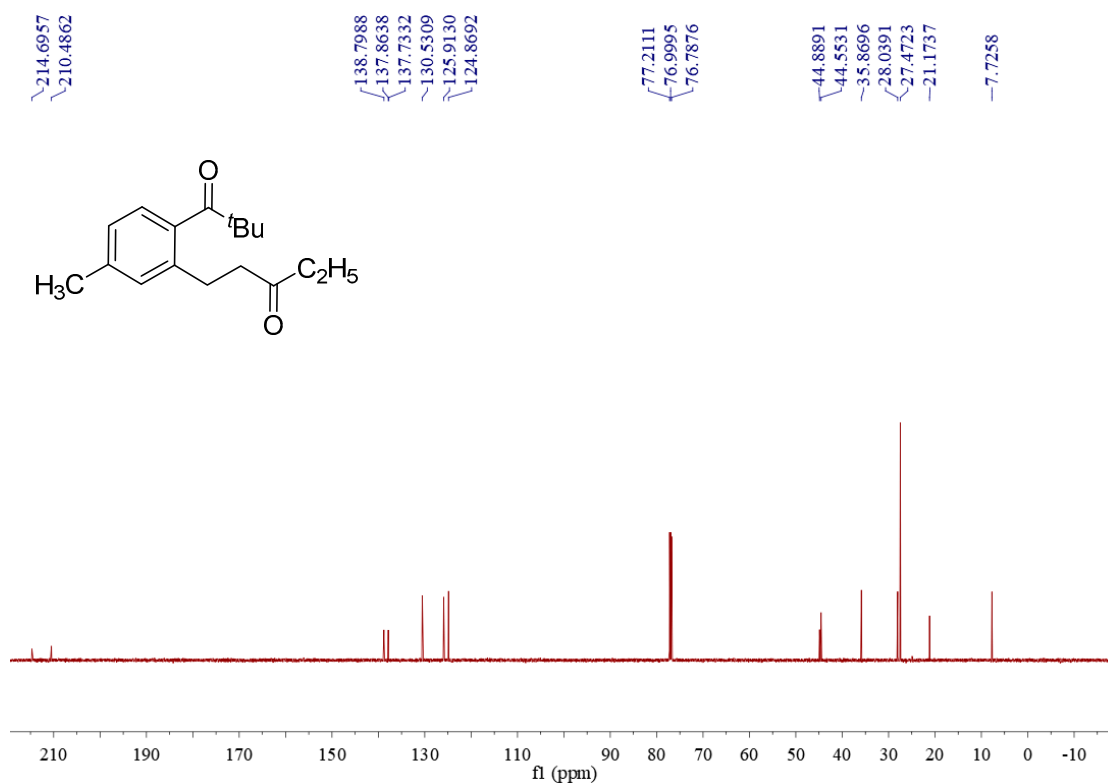Figure S37. <sup>13</sup>C NMR spectra of compound **4b**.

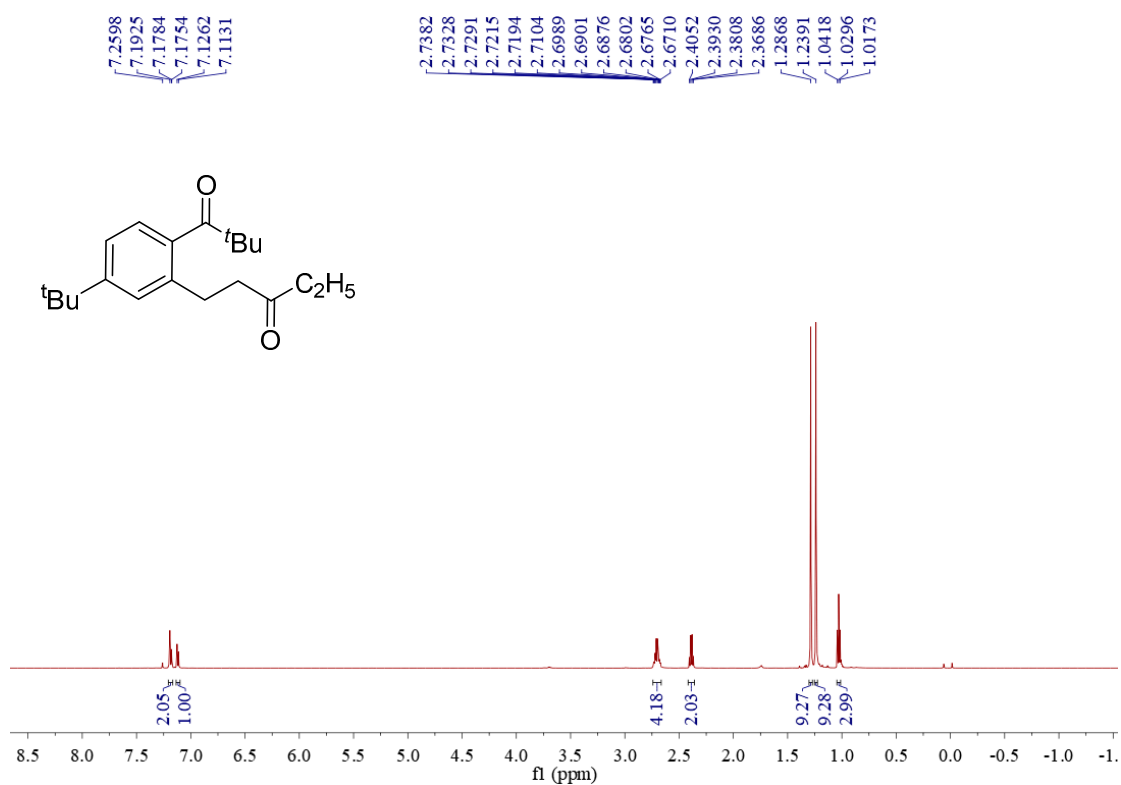Figure S38. <sup>1</sup>H NMR spectra of compound 4c.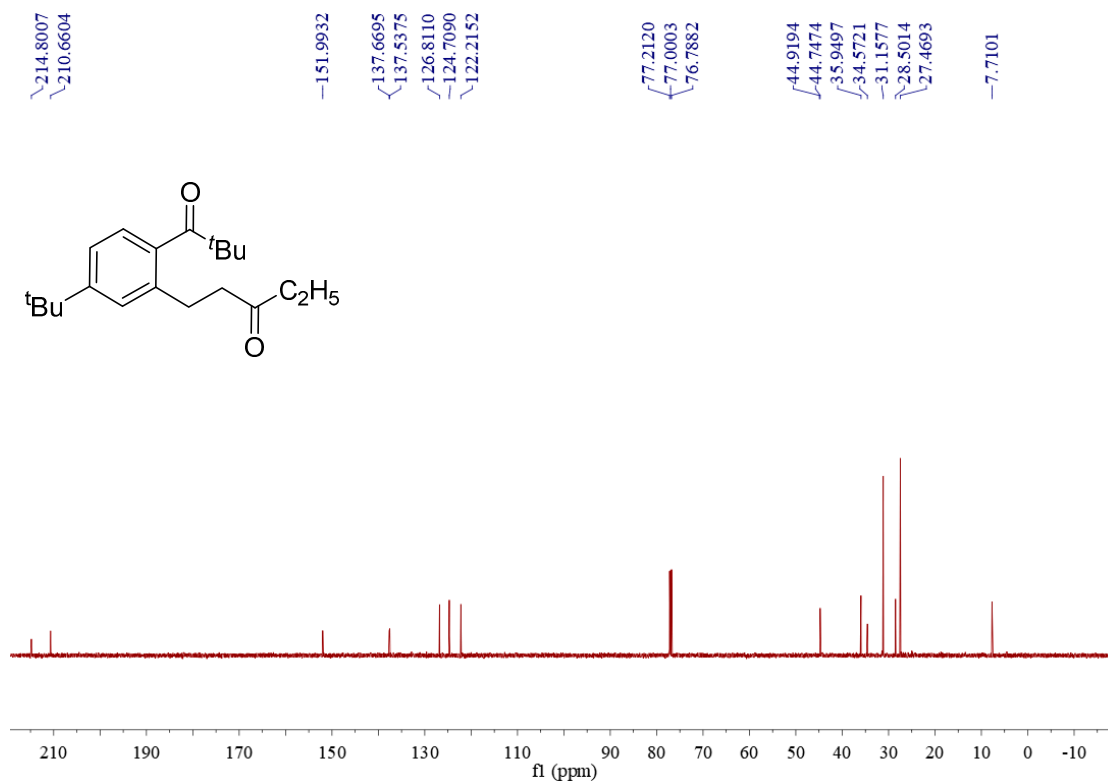Figure S39. <sup>13</sup>C NMR spectra of compound 4c.

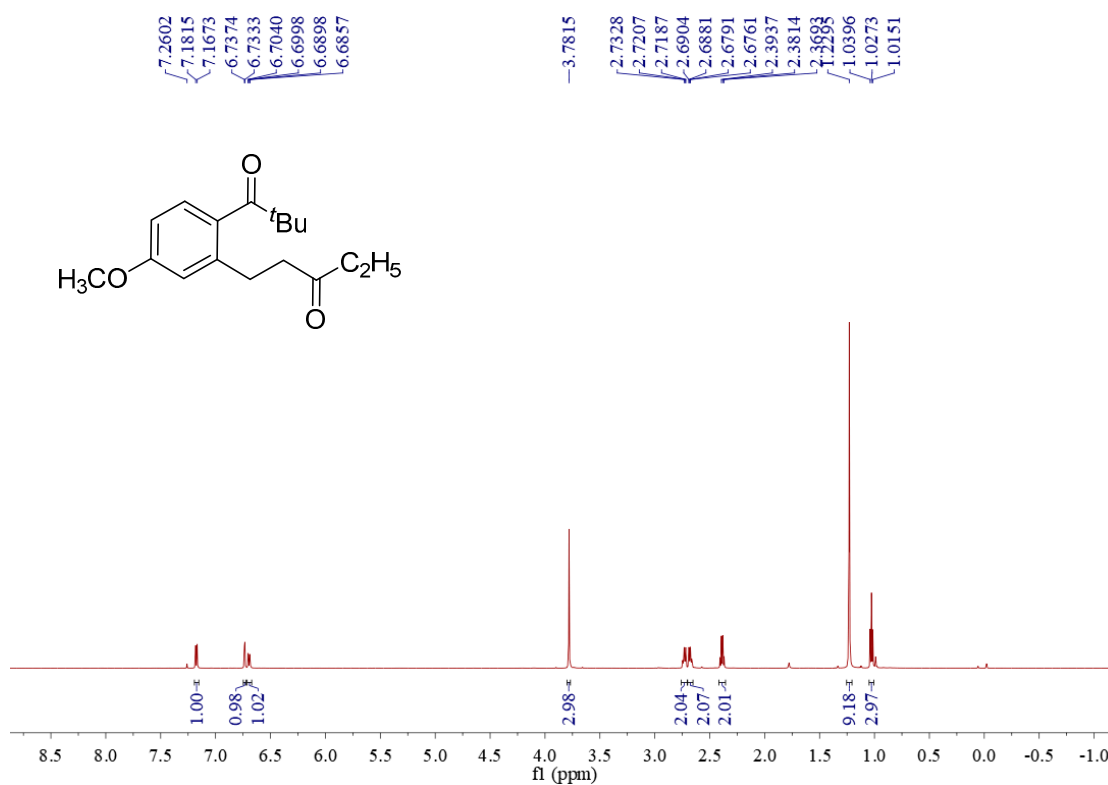Figure S40. <sup>1</sup>H NMR spectra of compound 4d.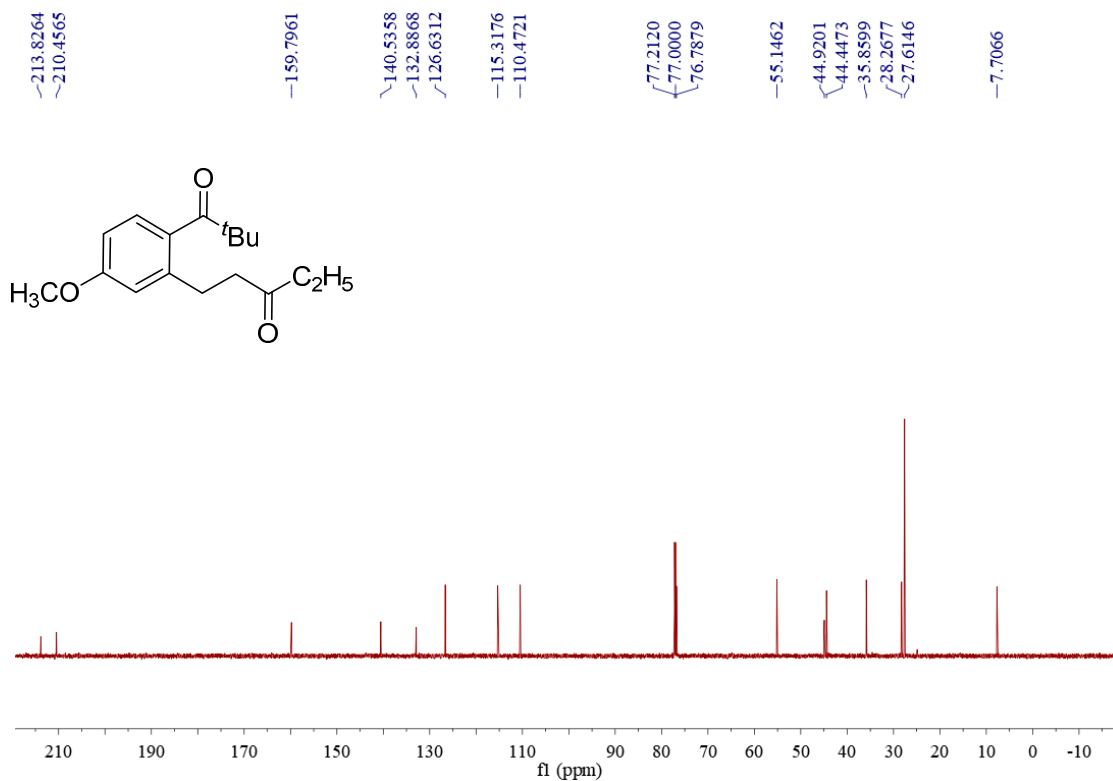Figure S41. <sup>13</sup>C NMR spectra of compound 4d.



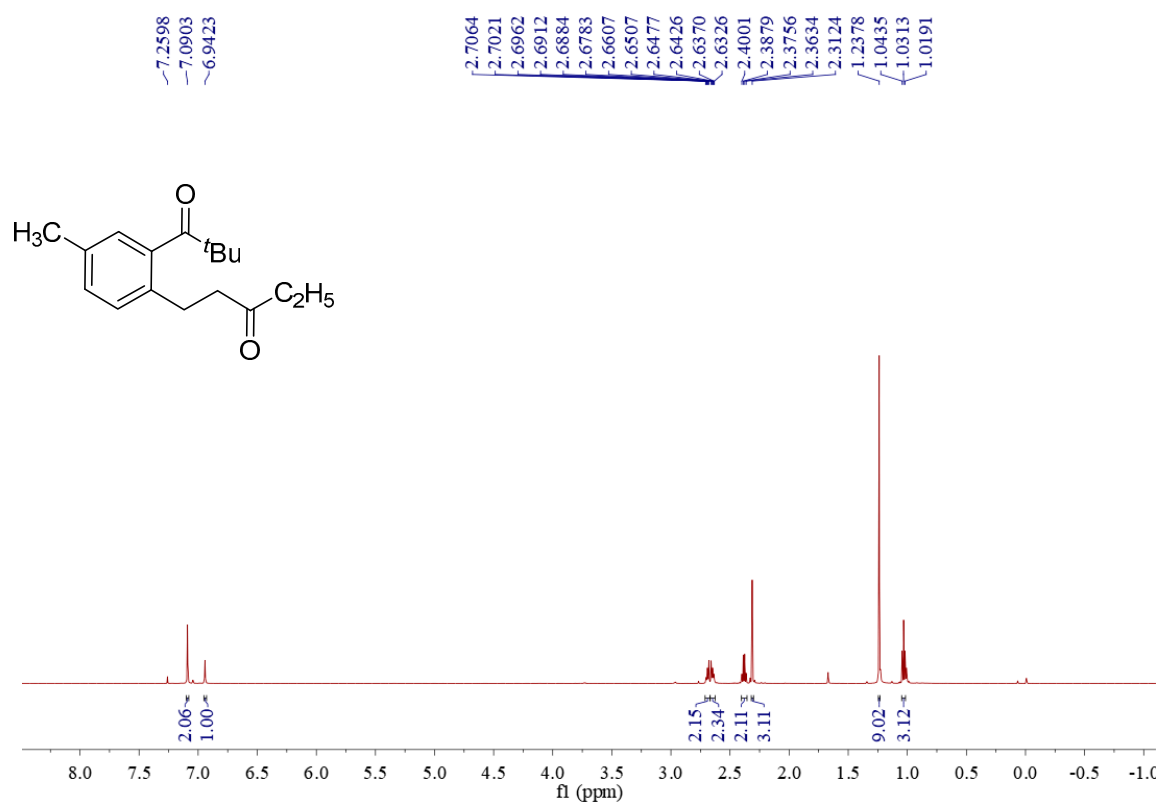Figure S42. <sup>1</sup>H NMR spectra of compound 4e.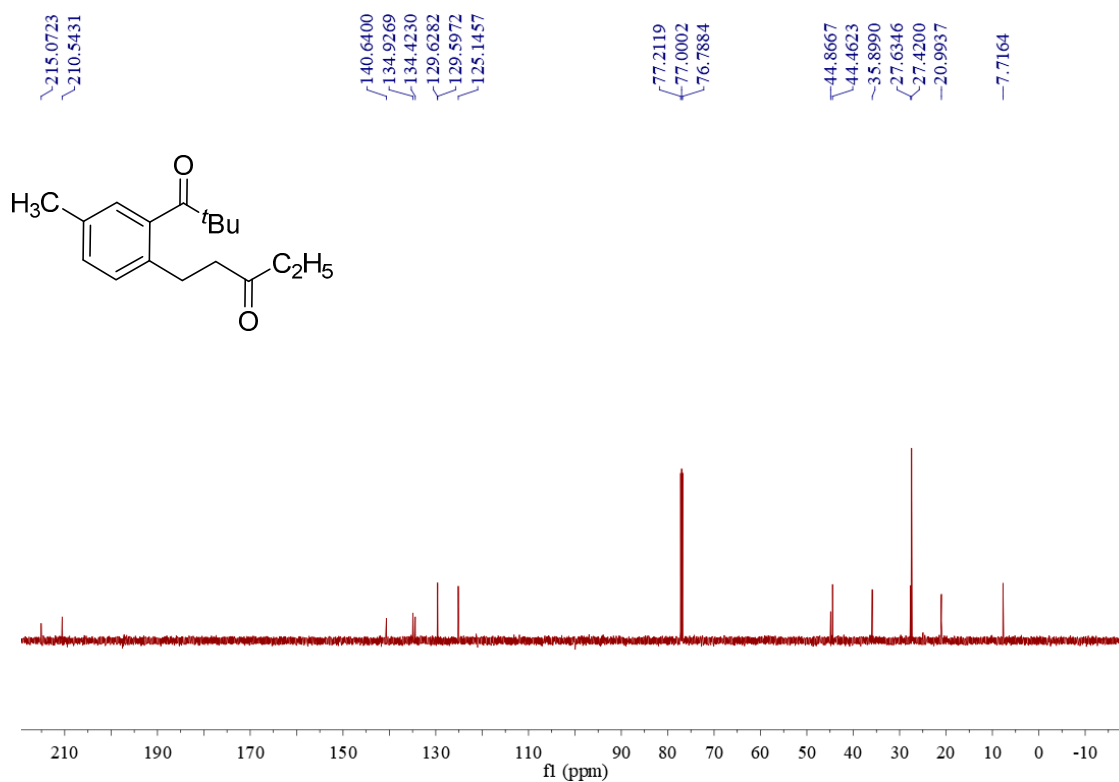Figure S43. <sup>13</sup>C NMR spectra of compound 4e.

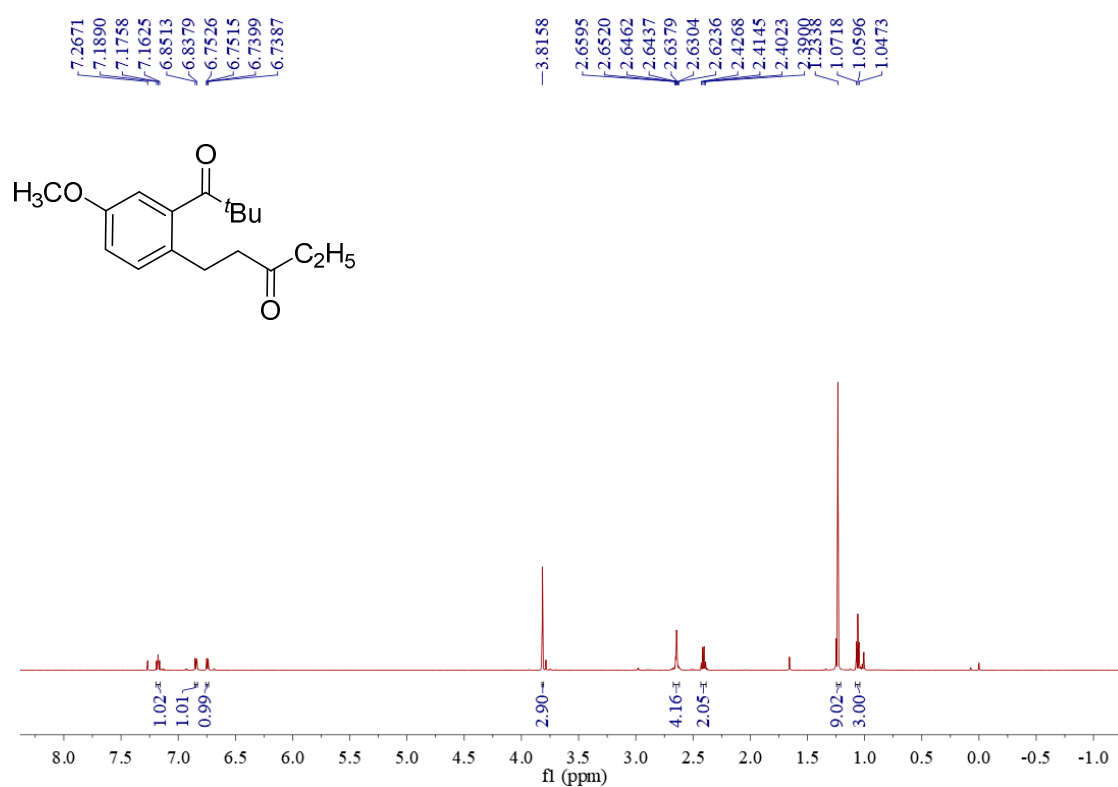Figure S44. <sup>1</sup>H NMR spectra of compound 4f.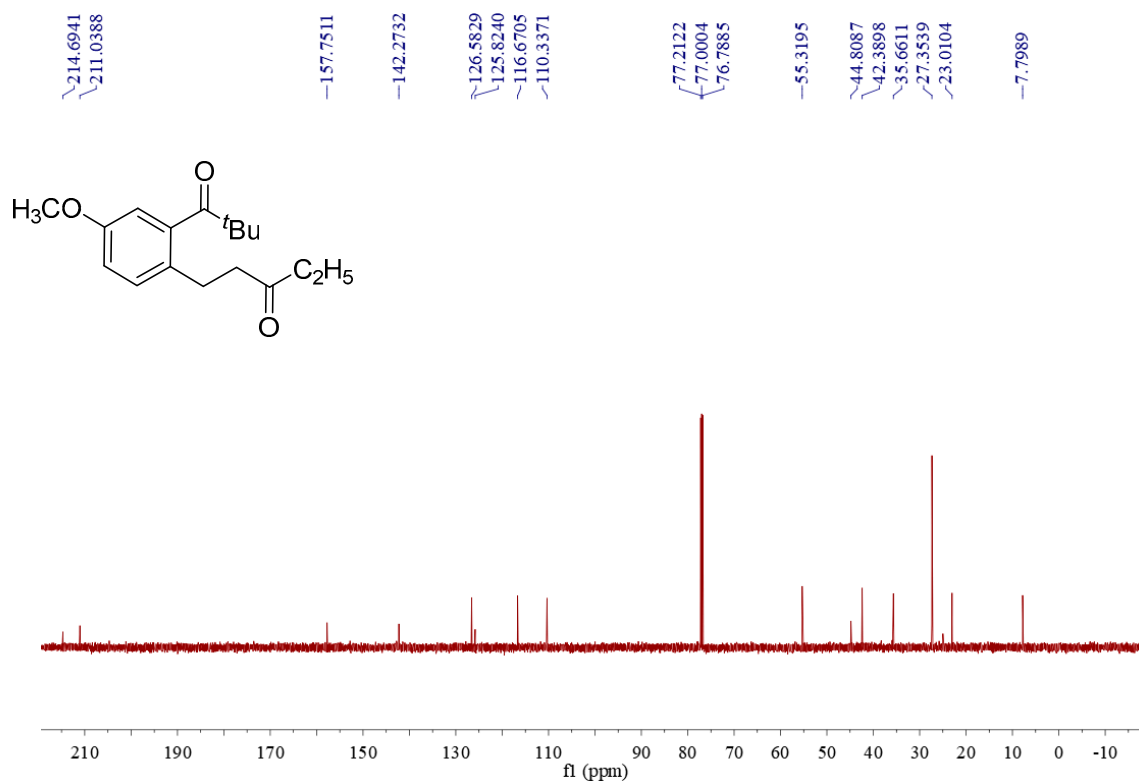Figure S45. <sup>13</sup>C NMR spectra of compound 4f.

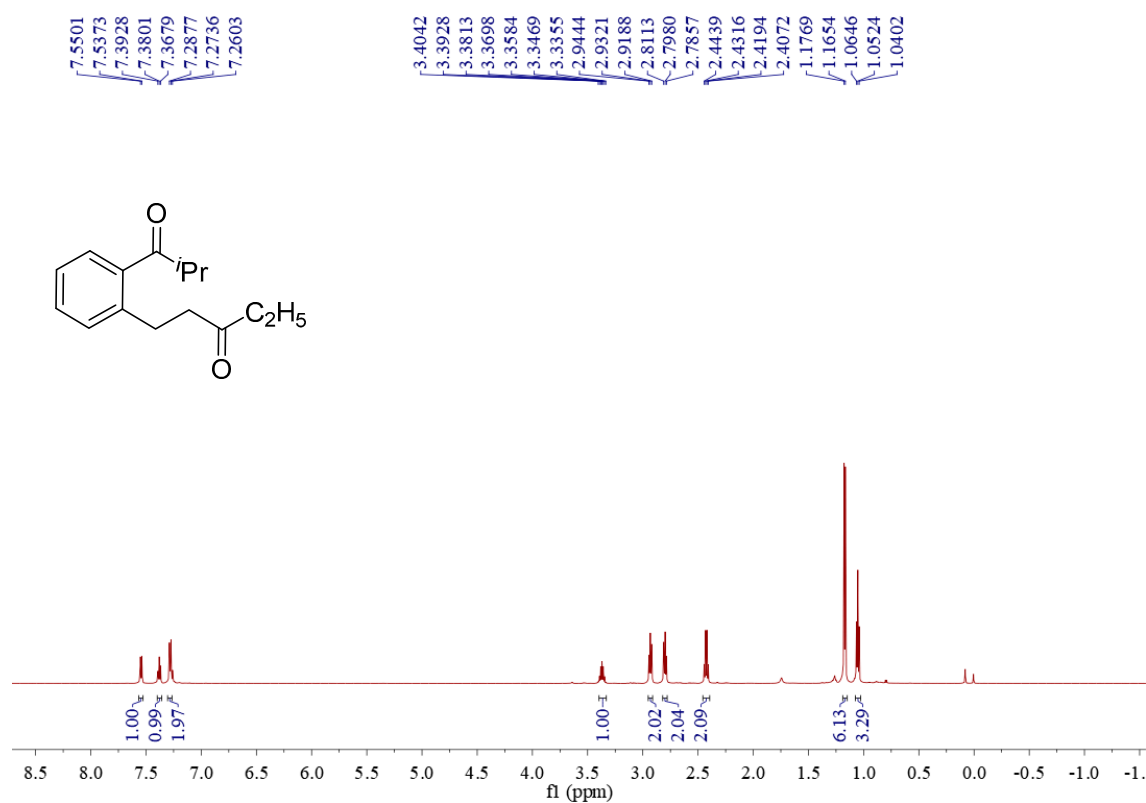Figure S46. <sup>1</sup>H NMR spectra of compound **4g**.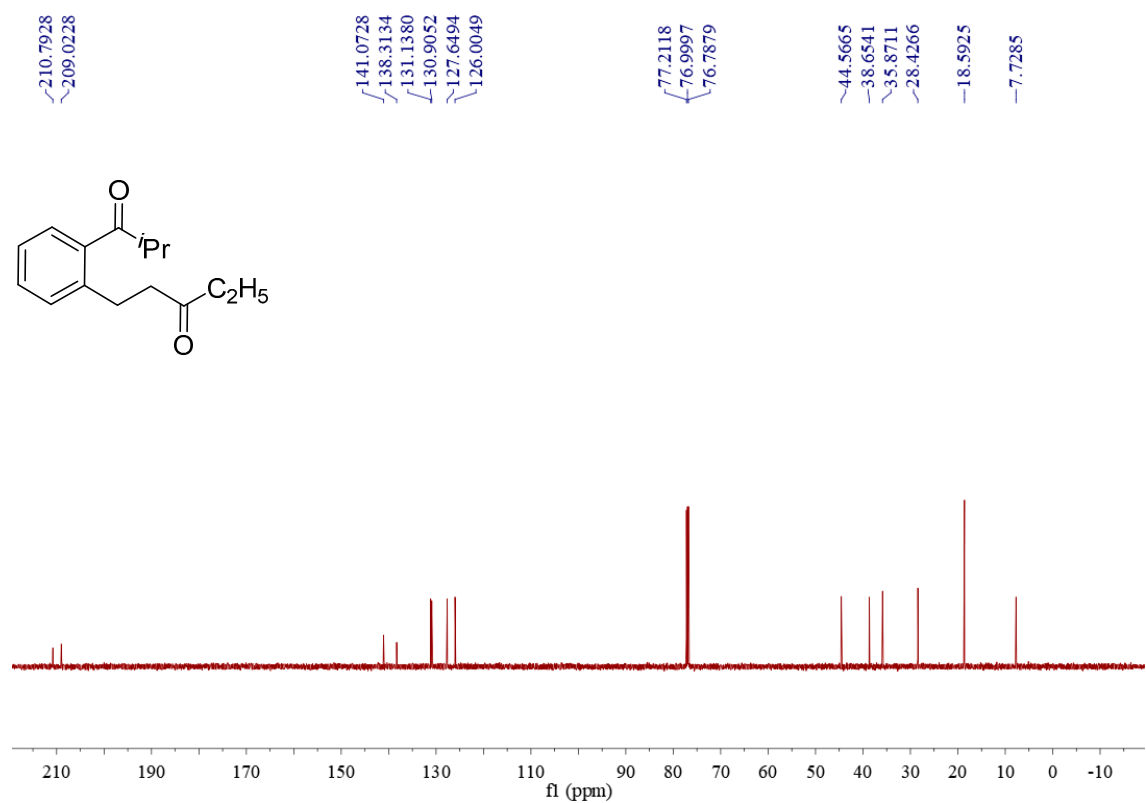Figure S47. <sup>13</sup>C NMR spectra of compound **4g**.

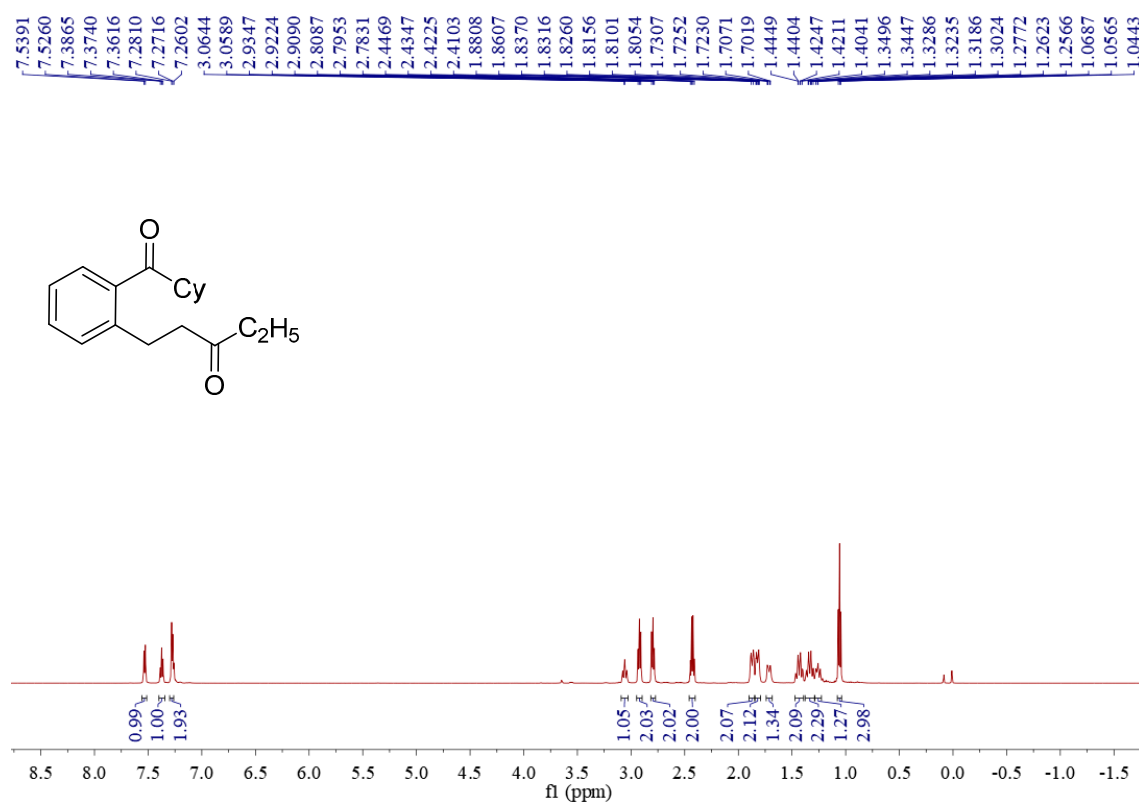Figure S48. <sup>1</sup>H NMR spectra of compound 4h.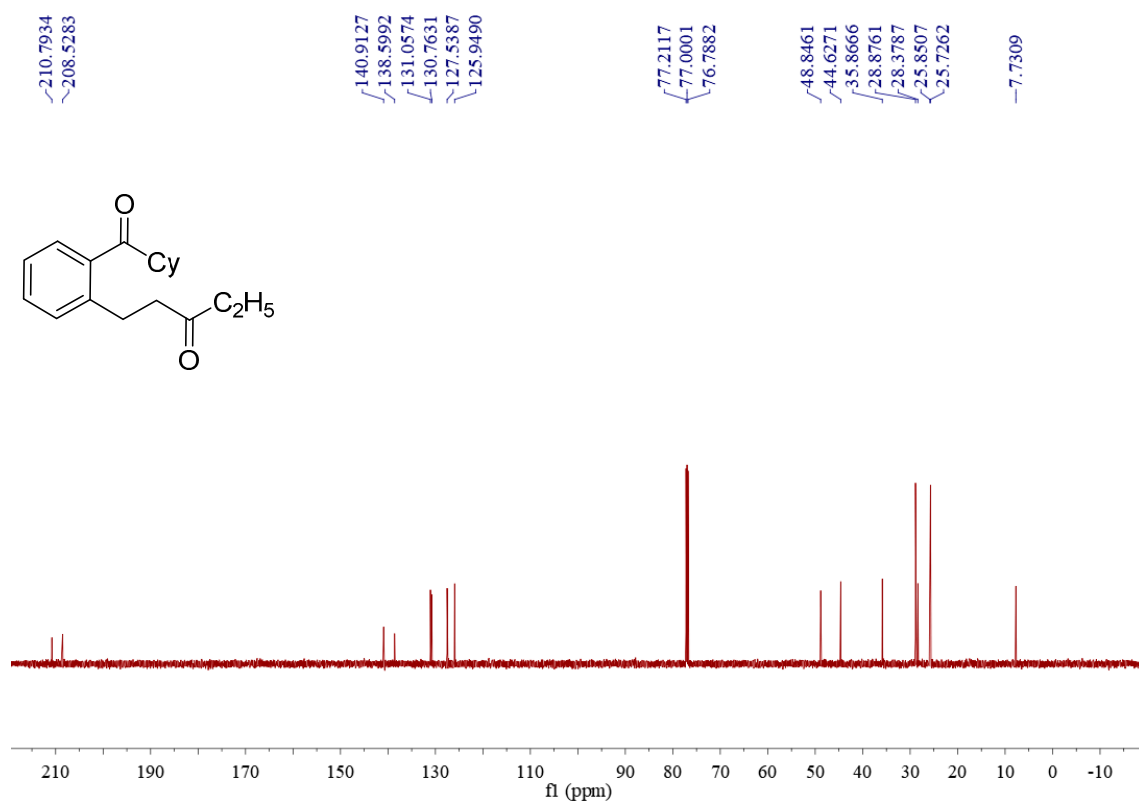Figure S49. <sup>13</sup>C NMR spectra of compound 4h.

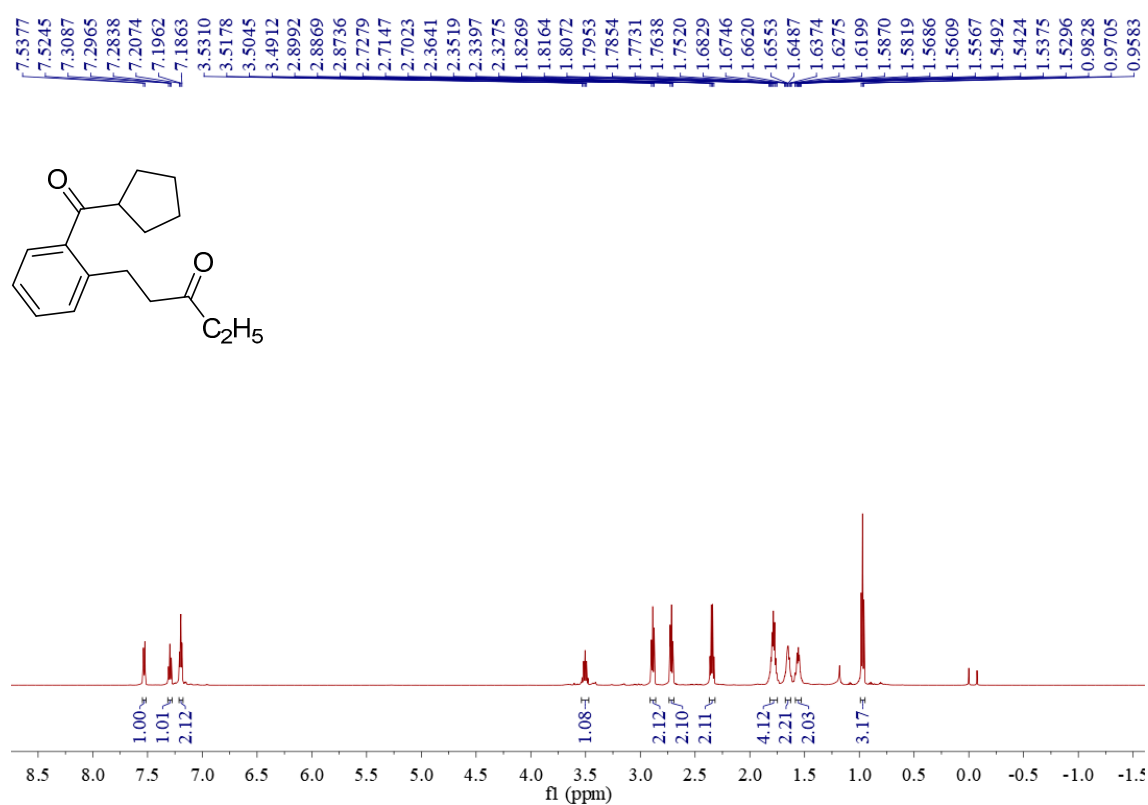Figure S50. <sup>1</sup>H NMR spectra of compound **4i**.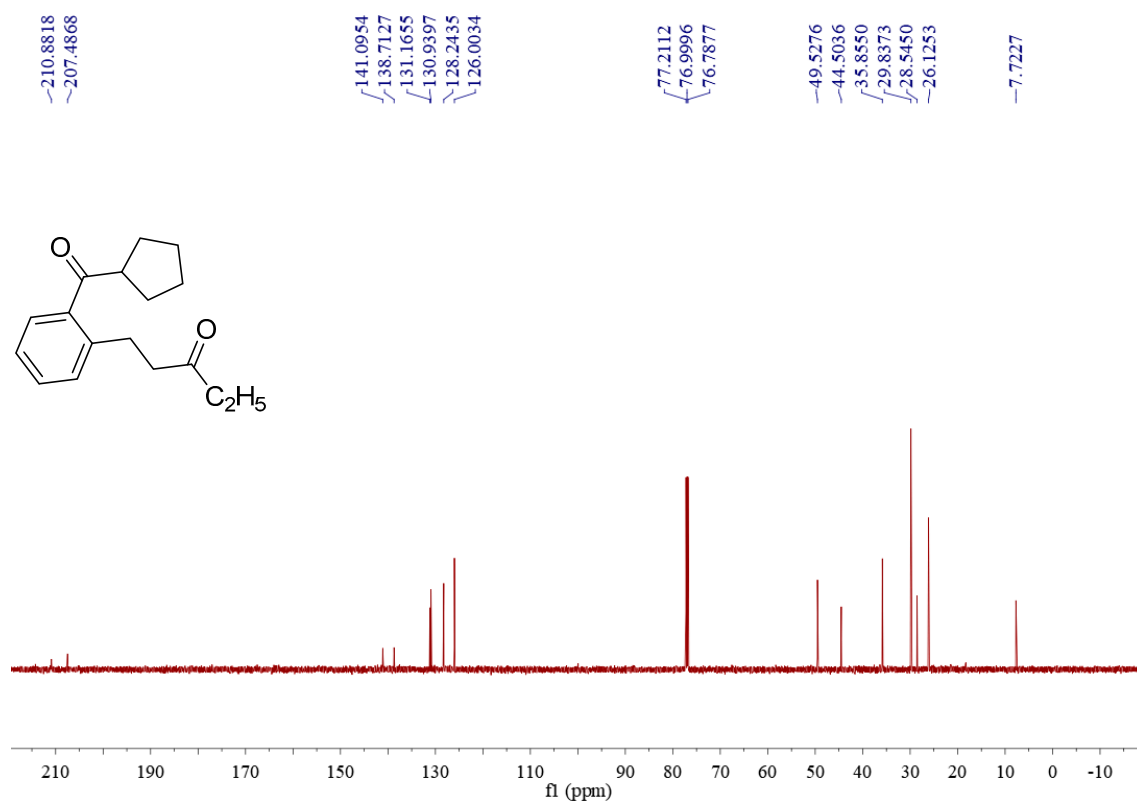Figure S51. <sup>13</sup>C NMR spectra of compound **4i**.

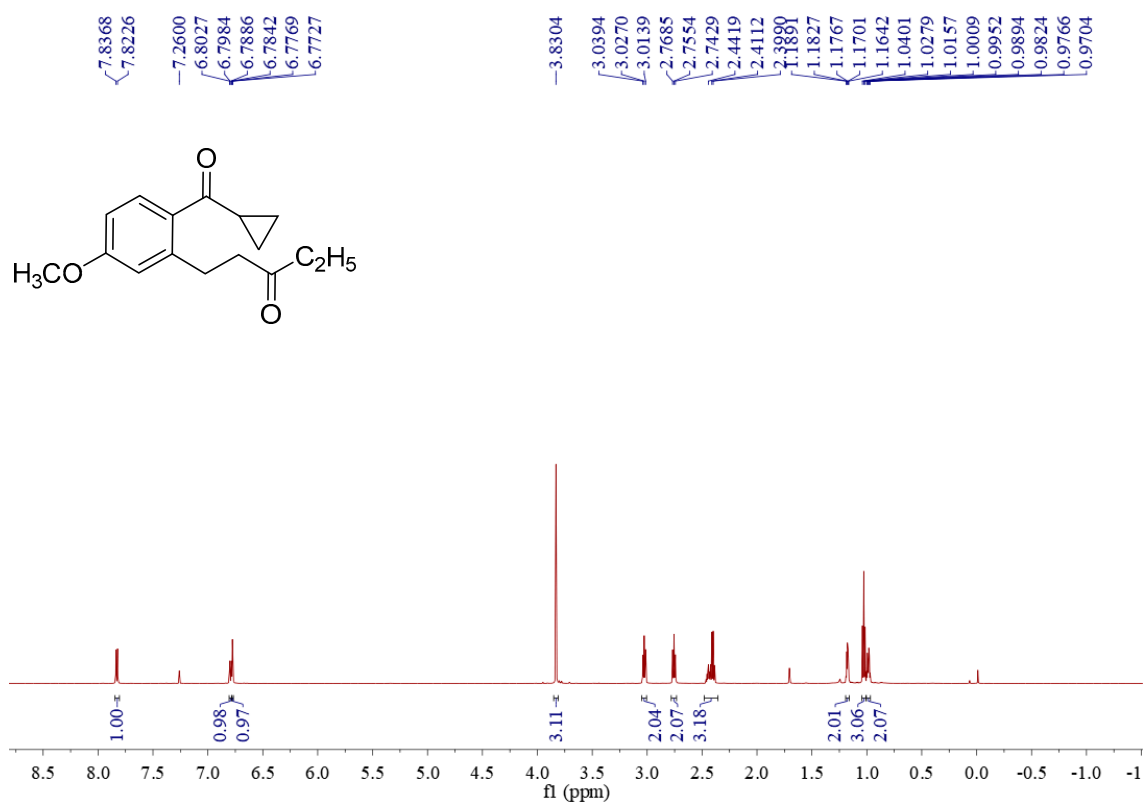Figure S52. <sup>1</sup>H NMR spectra of compound **4j**.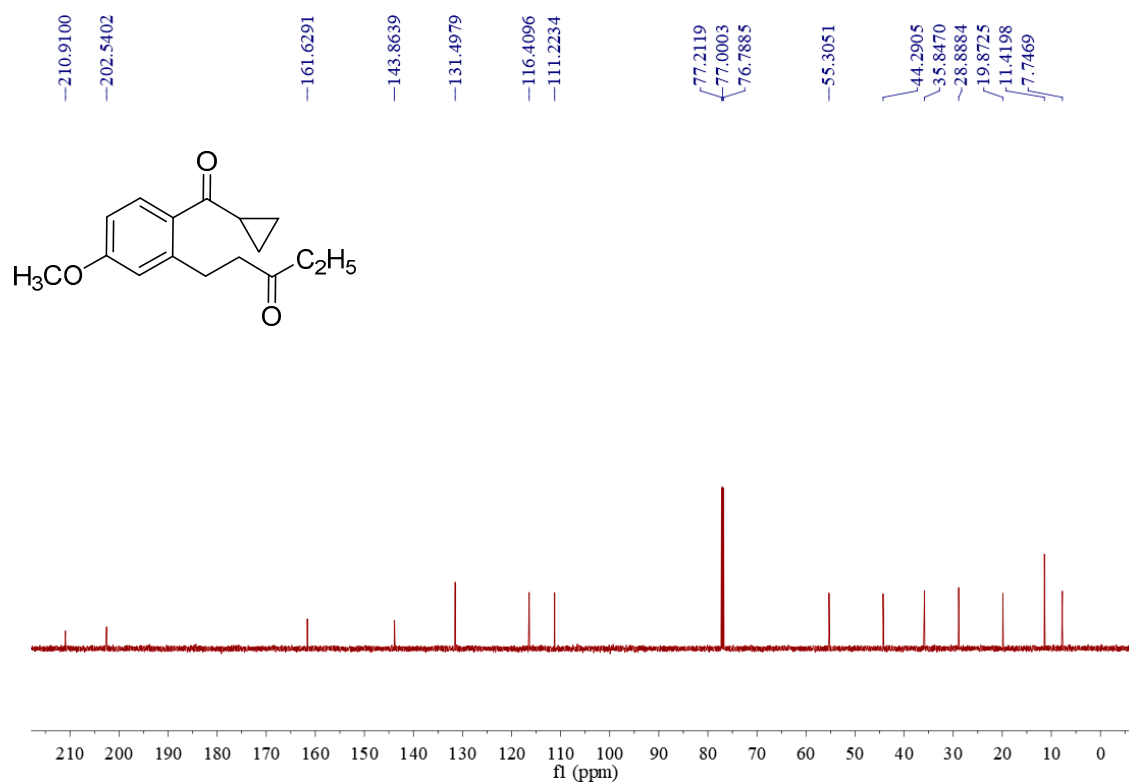Figure S53. <sup>13</sup>C NMR spectra of compound **4j**.

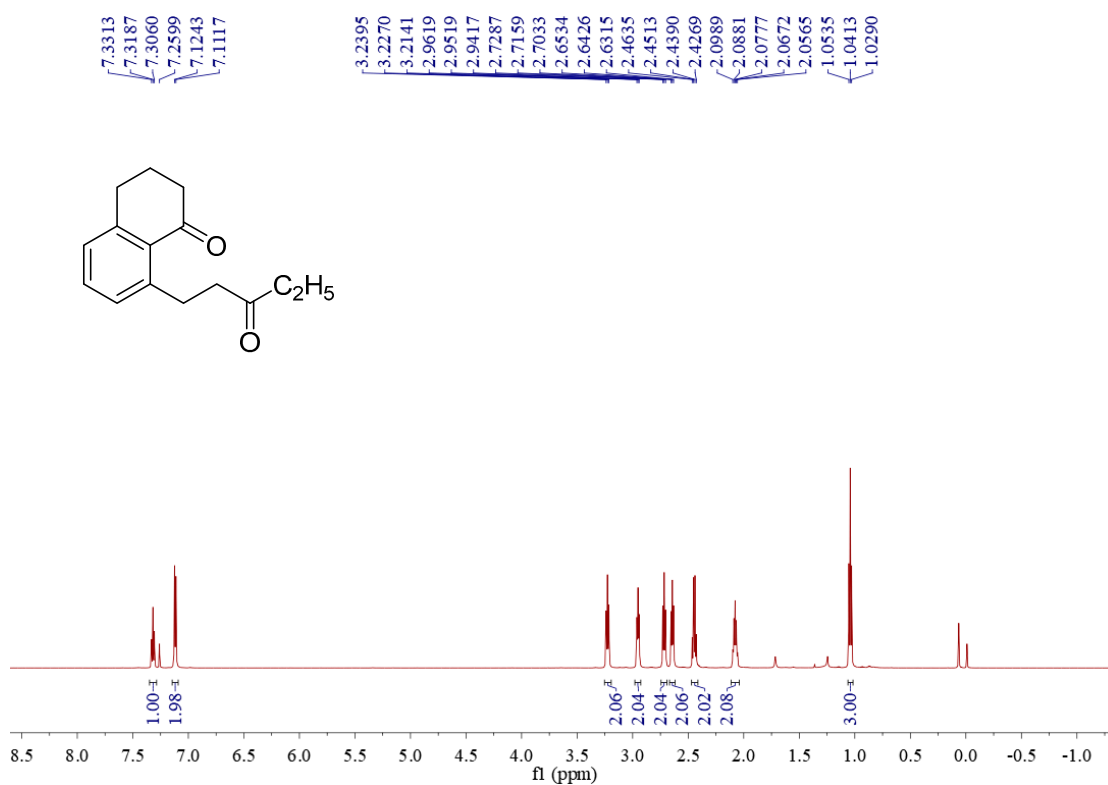Figure S54. <sup>1</sup>H NMR spectra of compound 4k.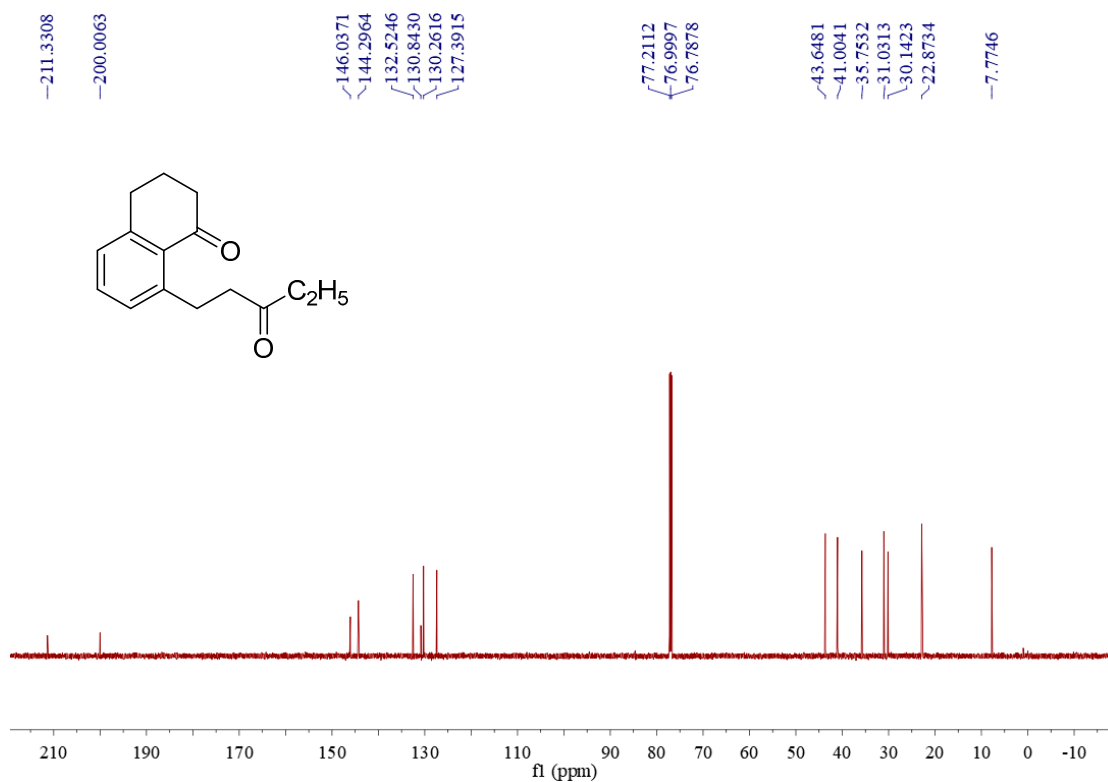Figure S55. <sup>13</sup>C NMR spectra of compound 4k.

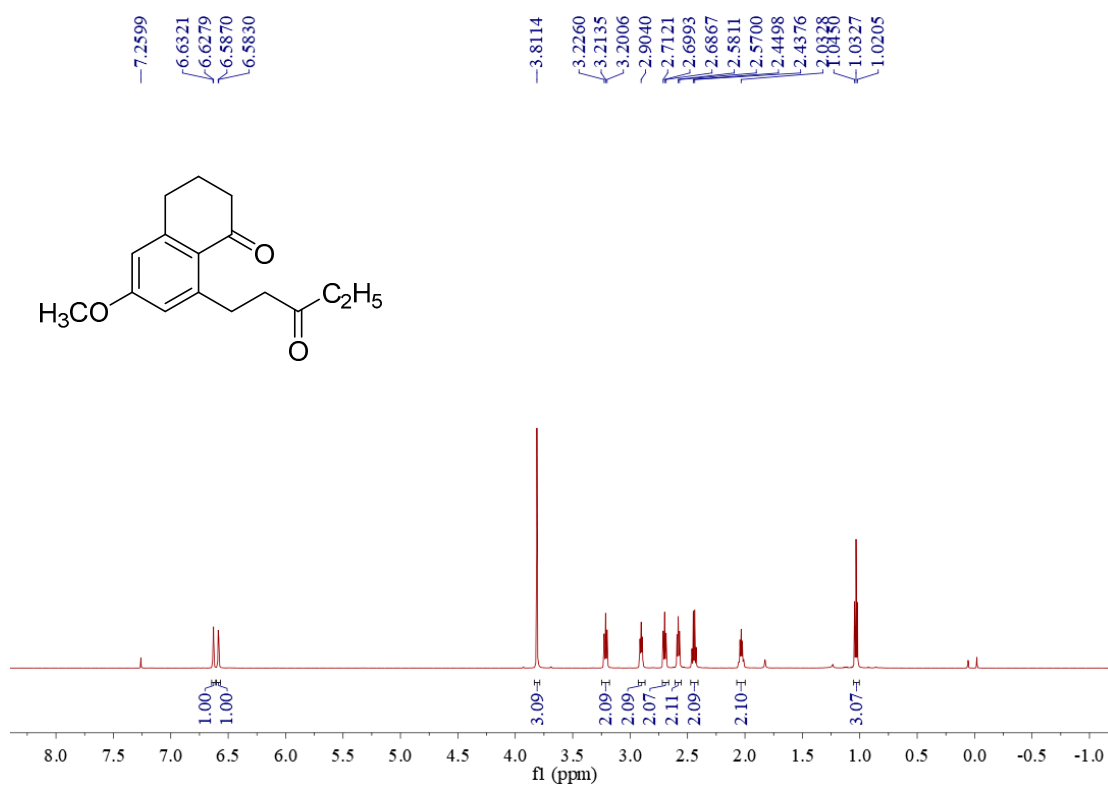Figure S56. <sup>1</sup>H NMR spectra of compound 4l.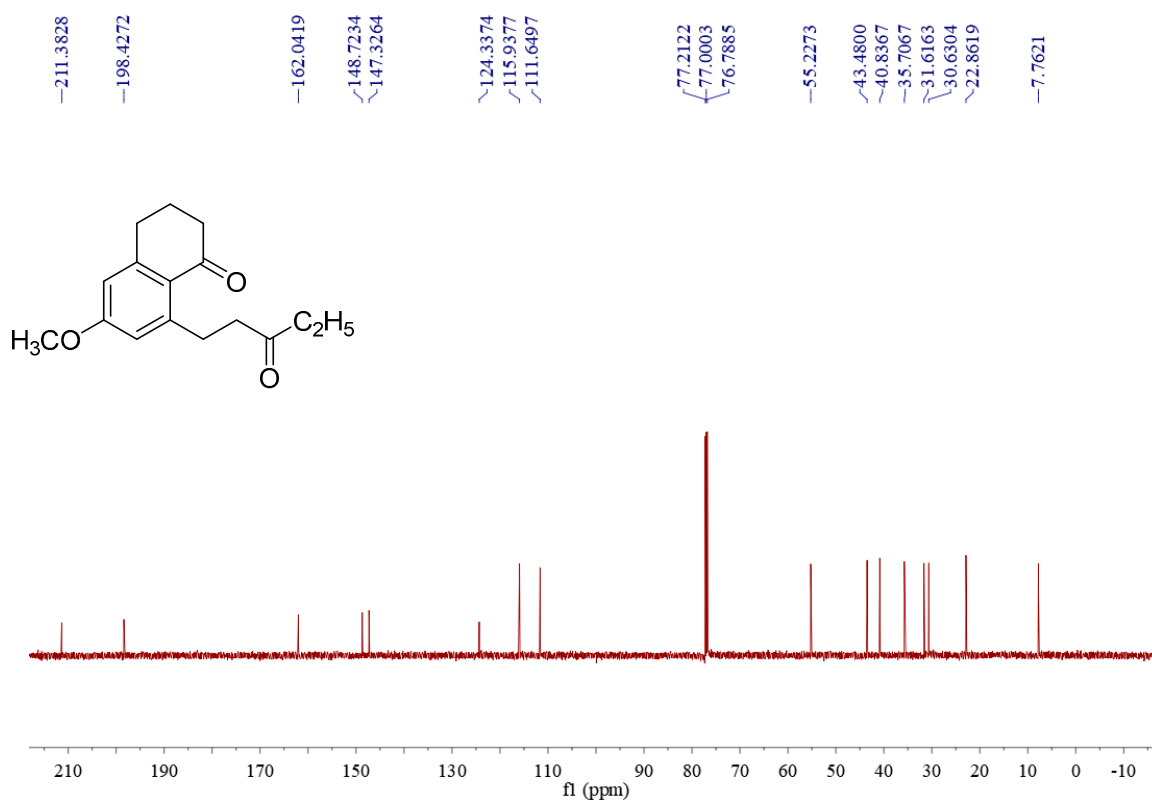Figure S57. <sup>13</sup>C NMR spectra of compound 4l.



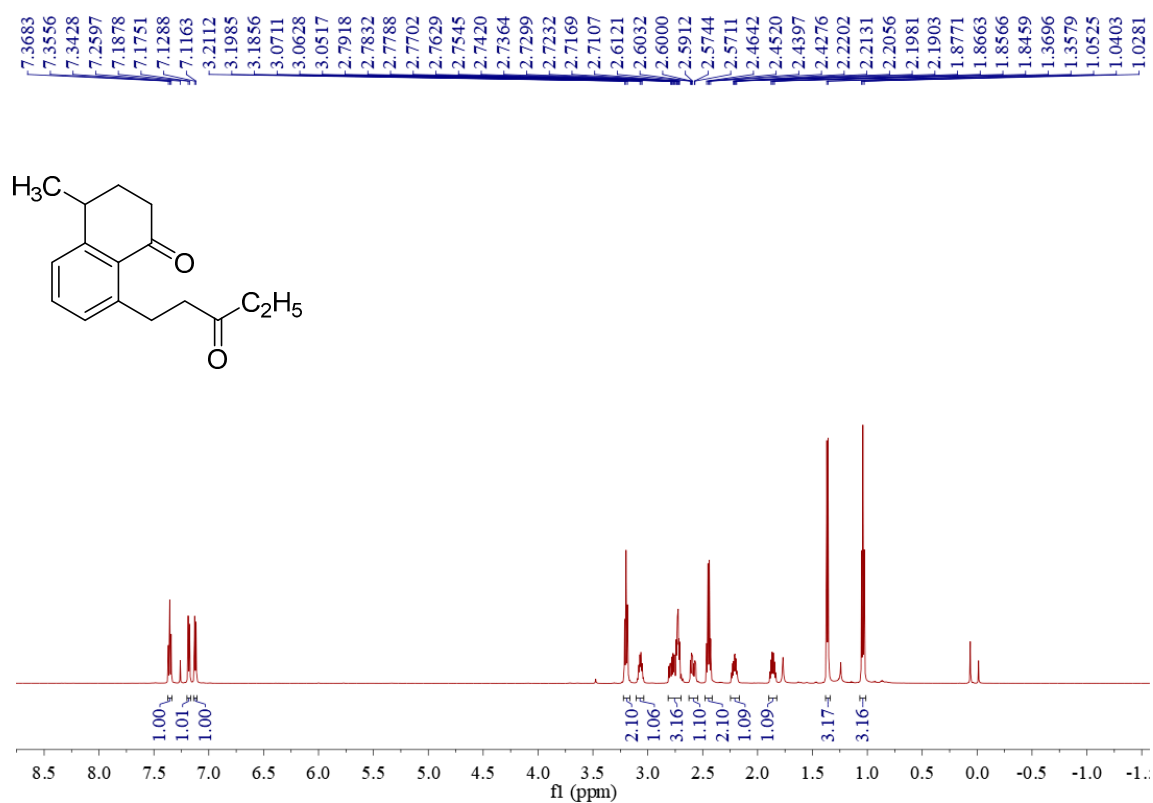Figure S58. <sup>1</sup>H NMR spectra of compound 4m.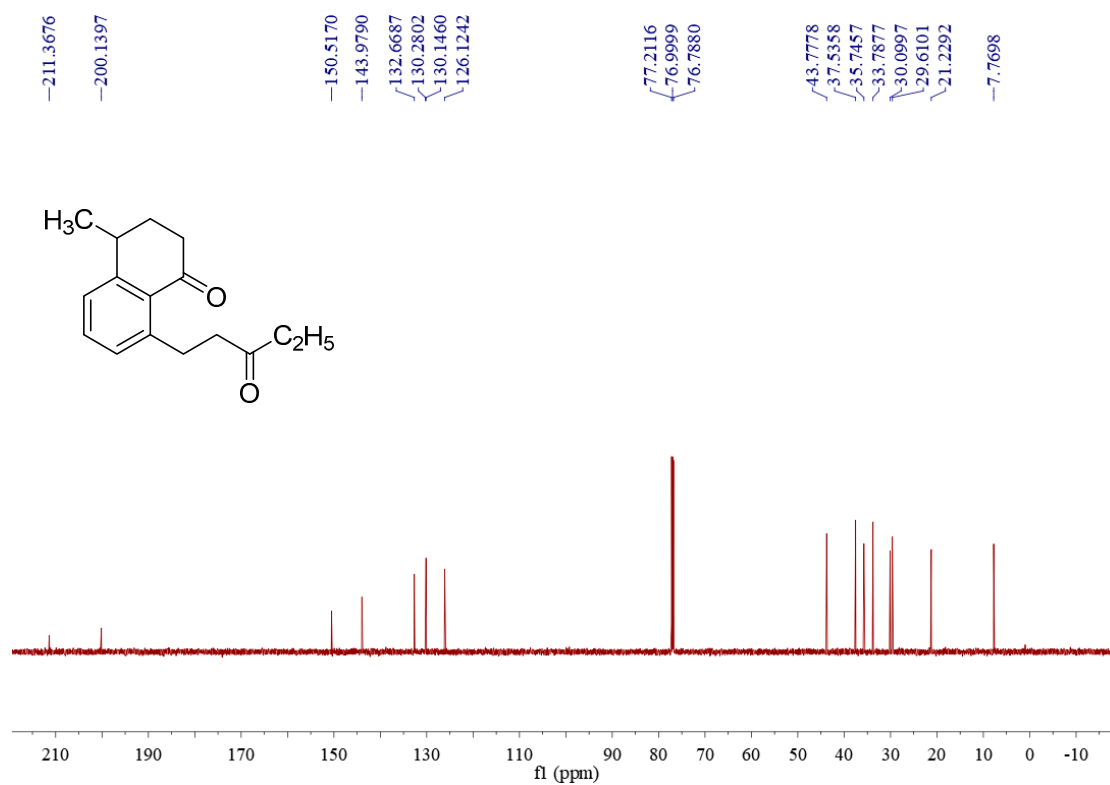Figure S59. <sup>13</sup>C NMR spectra of compound 4m.

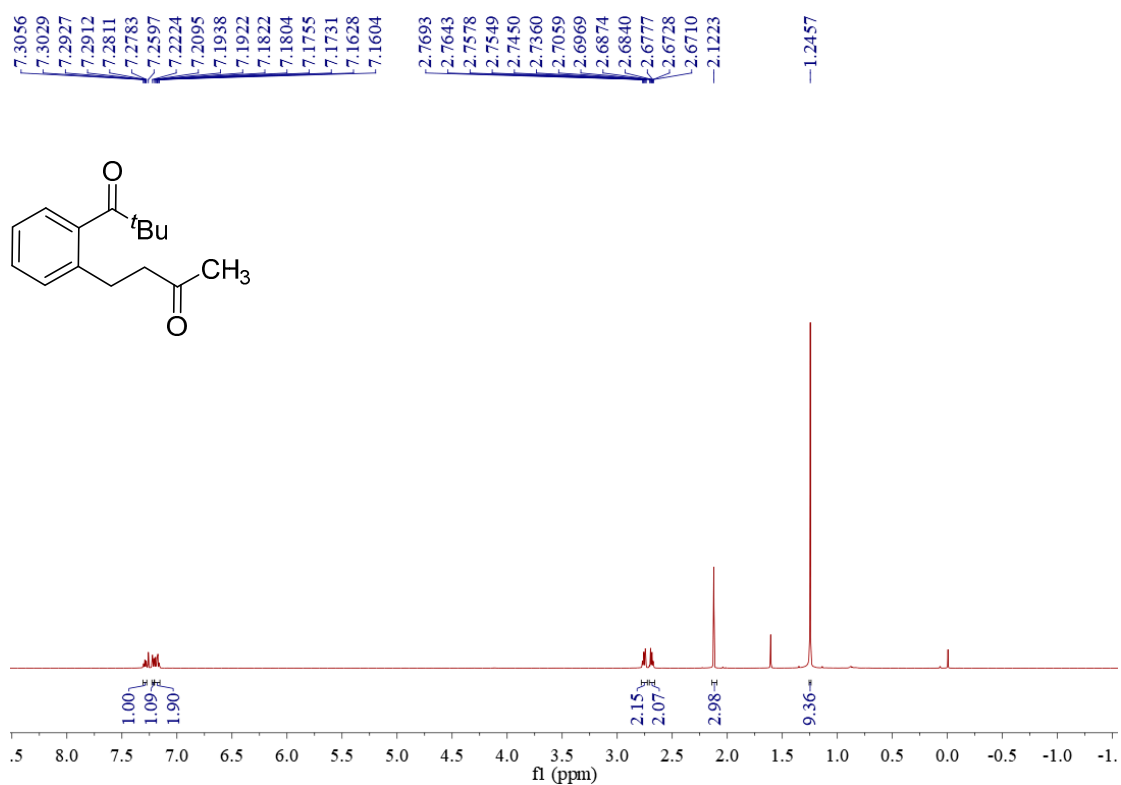Figure S60. <sup>1</sup>H NMR spectra of compound 4n.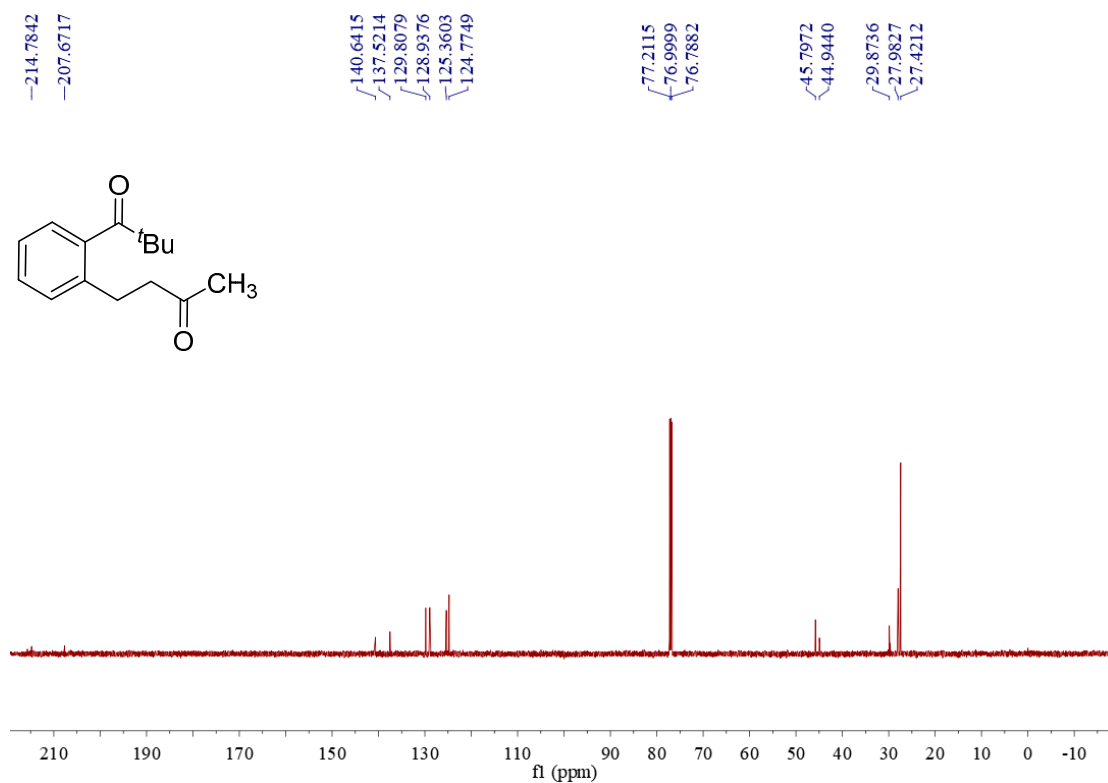Figure S61. <sup>13</sup>C NMR spectra of compound 4n.

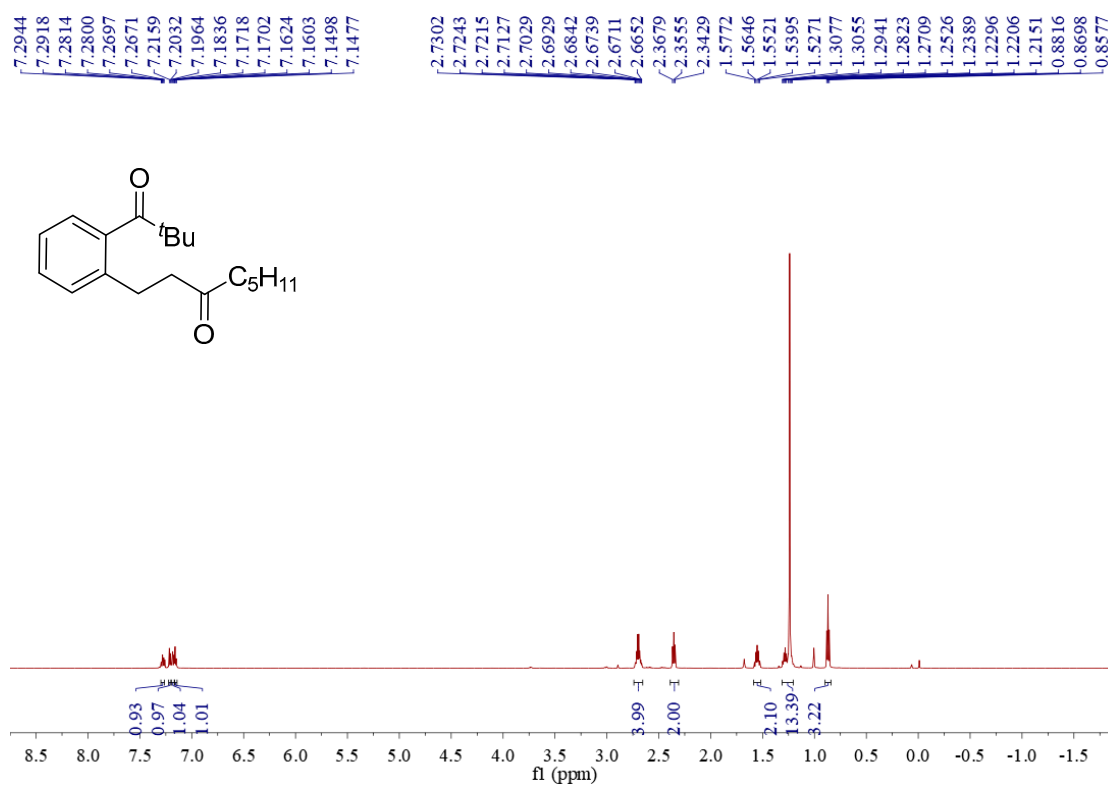Figure S62. <sup>1</sup>H NMR spectra of compound **4o**.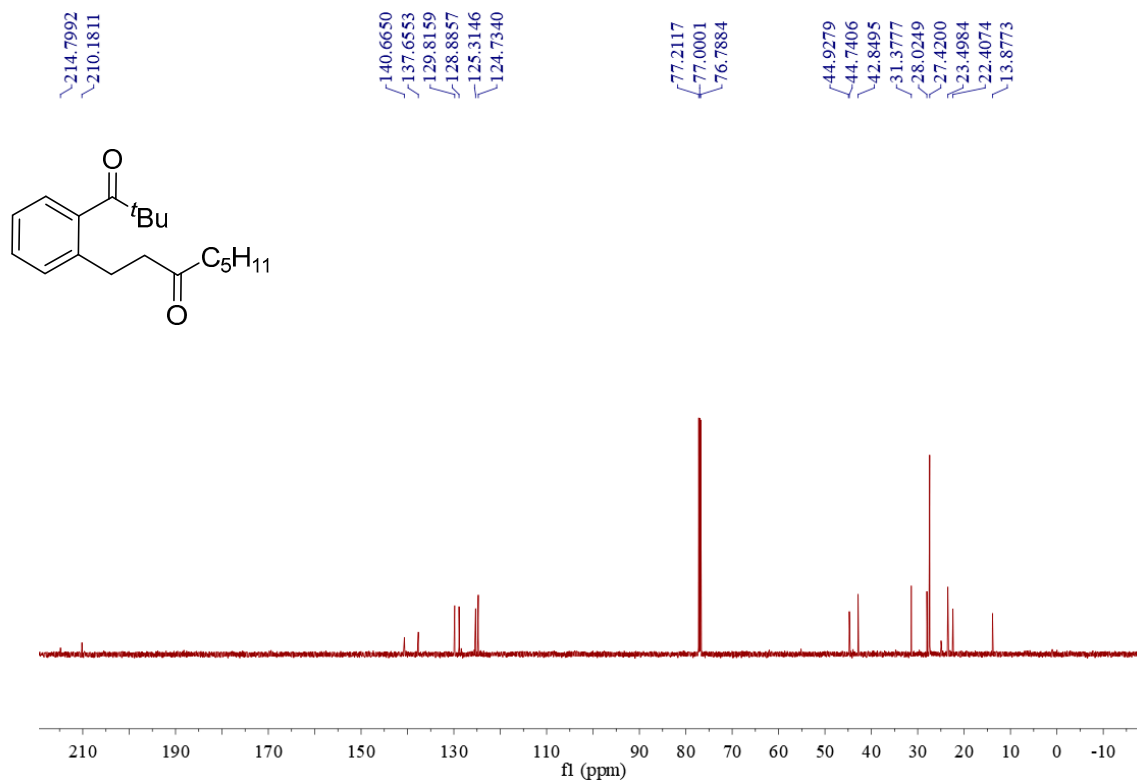Figure S63. <sup>13</sup>C NMR spectra of compound **4o**.

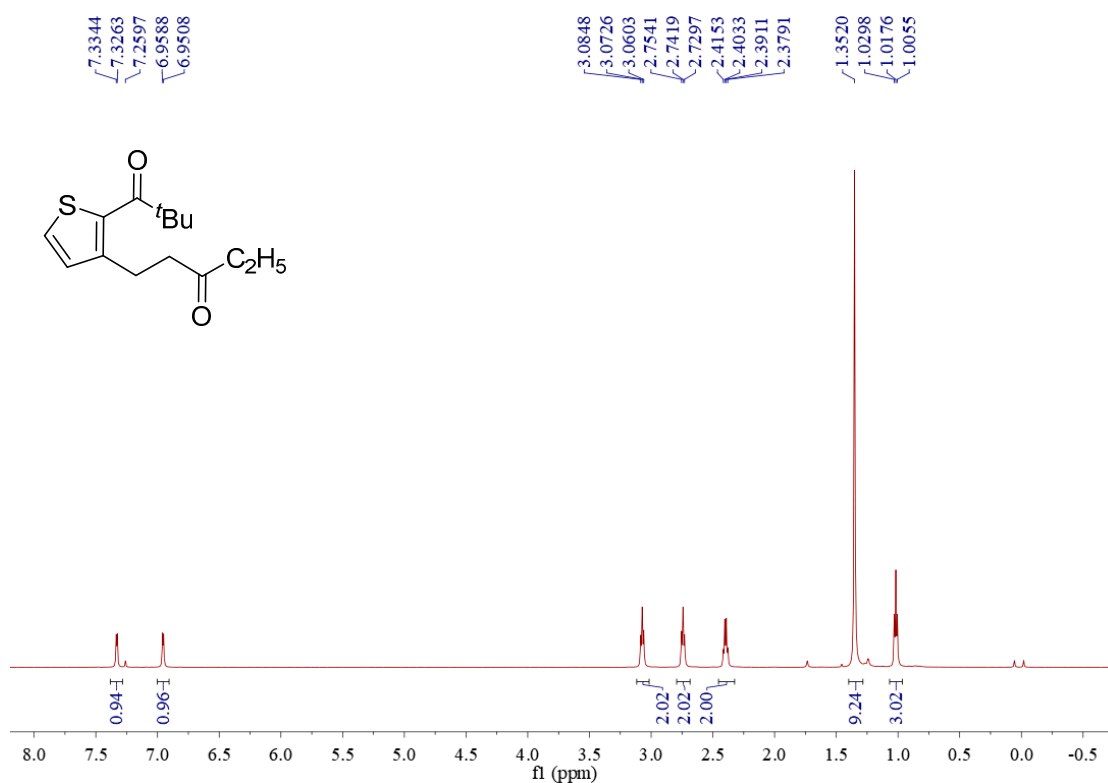Figure S64. <sup>1</sup>H NMR spectra of compound 4p.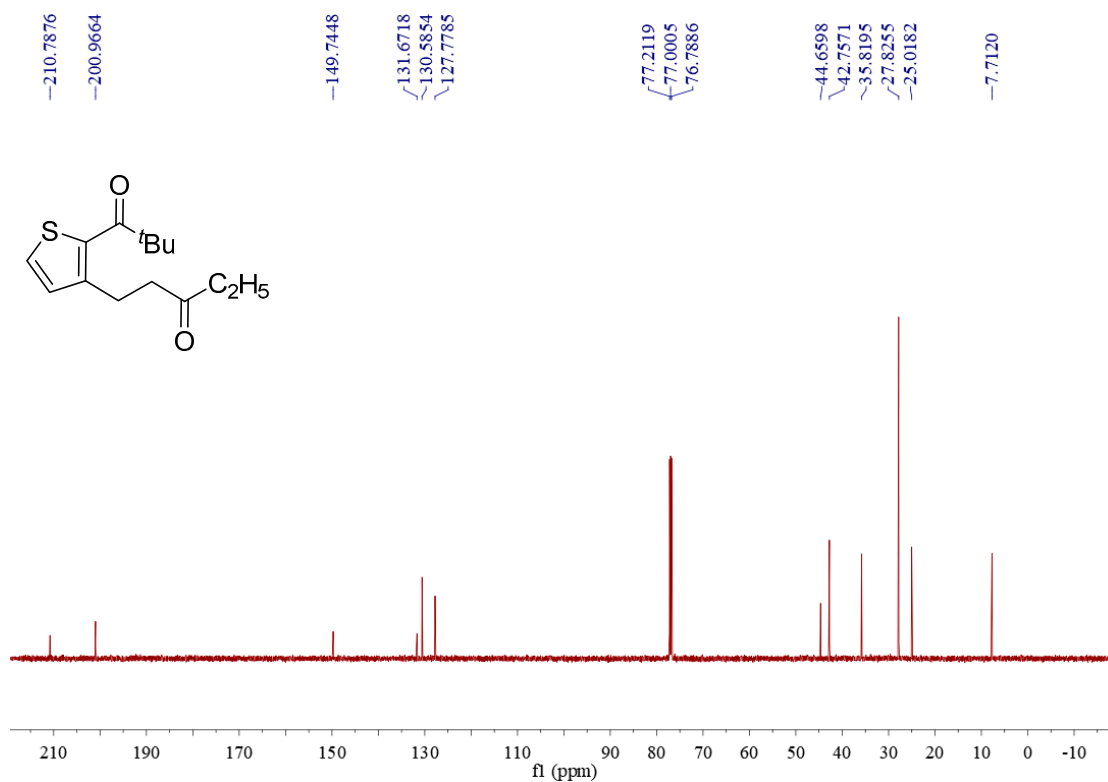Figure S65. <sup>13</sup>C NMR spectra of compound 4p.
